# The monophyly of Crenuchinae and description of two new species of *Poecilocharax* (Teleostei: Crenuchidae) based on phenotypic and genotypic evidence

WILLIAN M. OHARA<sup>1,2,\*</sup>, MURILO PASTANA<sup>3</sup> and PRISCILA CAMELIER<sup>4</sup>

<sup>1</sup>*Departamento de Biologia, Universidade Federal do Amazonas, Manaus, 69080900 AM, Brazil*

<sup>2</sup>*PPG em Conservação e Uso dos Recursos Naturais, Departamento de Biologia, Universidade Federal de Rondônia, Porto Velho, 76801-058, RO, Brazil*

<sup>3</sup>*Division of Fishes, Department of Vertebrate Zoology, National Museum of Natural History, Smithsonian Institution, Washington, 20002 DC, USA*

<sup>4</sup>*PPG em Biodiversidade e Evolução, Instituto de Biologia, Universidade Federal da Bahia (UFBA), Salvador, 40170-115 BA, Brazil*

Received 19 February 2021; revised 3 February 2022; accepted for publication 1 March 2022

Crenuchinae is a subfamily of the fish family Crenuchidae distributed in the Amazon Basin with pronounced sexual dimorphism and exuberant colour patterns. Recent fieldwork in the tributaries of the Rio Aripuanã drainage, a large tributary of the Rio Madeira (Amazon Basin), resulted in the discovery of two distinctive, undescribed species of the crenuchin genus *Poecilocharax*, which are formally described herein, combining morphological and molecular data. These are the first representatives of Crenuchinae discovered after a gap of 57 years and the first records of *Poecilocharax* from the tributaries of the right bank of the Rio Amazonas draining the Brazilian crystalline shield. Based on a taxonomic review including all species of the subfamily, we provide an expanded morphological diagnosis for Crenuchinae. This now includes characteristics related to the lateral-line canals of head and body, the number of dorsal-fin rays and sexually dimorphic traits. In addition, we review previous characteristics used to diagnose *Crenuchus* and *Poecilocharax*, providing comments on their polarity and distribution across the subfamily. A dichotomous key is provided for the first time for species of Crenuchinae.

ADDITIONAL KEYWORDS: Amazon – COI gene – DNA – freshwater fishes – lateral line – phylogeny – taxonomy – tetras.

## INTRODUCTION

Crenuchidae is a family of Neotropical fishes with 112 valid species (Fricke *et al.*, 2021a) inhabiting most freshwater drainages from eastern Panama to Argentina (Buckup, 1998, 2003). All crenuchid genera can be found in the Rio Amazonas and Orinoco basins: *Ammocryptocharax* Weitzman & Kanazawa, 1976 (four species), *Characidium* Reinhardt, 1867 (82 species), *Crenuchus* Günther, 1863 (one species), *Elachocharax* Myers, 1927 (four species), *Klausewitzia* Géry, 1965 (one species), *Leptocharacidium* Buckup, 1993 (one species), *Melanocharacidium* Buckup,

1993 (nine species), *Microcharacidium* Buckup, 1993 (five species), *Odontocharacidium* Buckup, 1993 (two species), *Poecilocharax* Eigenmann, 1909 (two species) and *Skiocharax* Presswell *et al.*, 2000 (one species). From these, almost two-thirds of the crenuchids are allocated in *Characidium*, and over 60% of the known diversity of *Characidium* is found outside the Rio Amazonas and Orinoco basins (Buckup, 1993a, 2003; Fricke *et al.*, 2021b). Crenuchid fish are usually small-sized, rarely surpassing more than 8 cm of standard length and include several miniature species (Weitzman & Vari, 1988; Buckup, 1993b; Toledo-Piza *et al.*, 2014). These fish occur in an array of freshwater environments, from small streams to large rivers, lakes or floodplains, but with most taxa preferring fast-flowing small streams, where they hover around pebbles, rocks and aquatic vegetation (Buckup, 2003).

\*Corresponding author. E-mail: [ohara@unir.br](mailto:ohara@unir.br)

[Version of record, published online 16 May 2022; <http://zoobank.org/> urn:lsid:zoobank.org:pub:3F65DD5D-3C73-49A8-88F5-E047CFDEB68B]

Phylogenetic hypotheses based on both morphological and molecular data are discordant regarding the positioning of Crenuchidae in Characiformes (e.g. [Buckup, 1993a, 1998](#); [Ortí & Meyer, 1997](#); [Calcagnotto et al., 2005](#); [Mirande, 2009](#); [Oliveira et al., 2011](#); [Arcila et al., 2017](#); [Betancur-R et al., 2019](#)). Nevertheless, after [Buckup's \(1998\)](#) revisionary study, the monophyly of the family has never been questioned and Crenuchidae are still diagnosed by six synapomorphies. The family also has a stable composition and internal classification (see: [Buckup, 1993b,c, 1998, 2003](#); [Betancur-R et al., 2019](#)), with crenuchid species allocated in two subfamilies: Characidiinae, which harbour most of the richness of the family, with seven genera and 109 valid species, and Crenuchinae currently known from two genera and three species ([Fricke et al., 2021a](#)).

Crenuchinae are composed of *Crenuchus spilurus* [Günther, 1863](#) (type species of the family Crenuchidae), *Poecilocharax bovaliorum* [Eigenmann, 1909](#) and *Poecilocharax weitzmani* [Géry, 1965](#). *Poecilocharax* is currently distinguished from *Crenuchus* based on four morphological characteristics: (1) absence of an adipose fin; (2) maxillar short; (3) presence of maxillary teeth; and (4) absence of an asymmetrical caudal-peduncle spot ([Eigenmann, 1909](#); [Géry, 1965](#); [Buckup, 1998](#)). In the aquarium trade, *C. spilurus* is known as 'sailfin tetra' and the species of *Poecilocharax*, in special *P. weitzmani*, as 'black morpho tetra', 'colibri tetra' or 'black darter tetra' ([Froese & Pauly, 2000](#)). Both genera inhabit either black- or clear-water rivers of the Amazon Basin, occurring preferentially in slow-flowing body waters or marginal lakes. Whereas *C. spilurus* is abundant and broadly distributed in the Amazon drainage ([Pires et al., 2016](#)), *Poecilocharax weitzmani* is restricted to the upper Rio Negro, Solimões and Orinoco Basins (Brazil, Peru, Colombia and Venezuela) and *P. bovaliorum* is known only from the Potaro River Basin in Guyana ([Buckup, 2003](#); [Fricke et al., 2021b](#)).

From a phylogenetic perspective, the subfamily Crenuchinae is widely accepted as monophyletic and supported by 12 morphological synapomorphies ([Buckup, 1998](#)). Among the diagnostic characters supporting this subfamily, the most remarkable is the presence of a frontal organ formed by a subcutaneous space filled with a thick collagenous pad fitting a depression of the frontal bone, innervated by trunks of the ophthalmicus superficialis branch of the trigeminal nerve ([Alexander, 1963](#); [Géry, 1963](#)). Up to the present date, no morphological or molecular phylogenetic studies have verified the interrelationships in Crenuchinae, and both the monophyly of the subfamily and of its genera still rely on [Buckup \(1998: 136\)](#).

Ichthyological expeditions in 2015 and 2016 in the Rio Aripuanã drainage – a major tributary of the Rio Madeira Basin in the state of Amazonas, Brazil

– resulted in the discovery of two additional and distinctive crenuchid species belonging to the genus *Poecilocharax*, representing the first new species of the subfamily discovered in the last 57 years.

In this contribution, the two new species are formally described using a combined approach based on morphological and molecular data. In addition, we conduct a detailed, comparative, morphological study that discusses current synapomorphies for the subfamily. This adds five putative new synapomorphies for Crenuchinae and provides an updated diagnosis for *Poecilocharax* accounting for the description of the two new species. Moreover, we report a considerable expansion on the geographical distribution of *Poecilocharax*, because these are the first records of the genus from the right bank tributaries of the Rio Amazonas Basin that drains the Brazilian crystalline shield.

## MATERIAL AND METHODS

Measurements follow [Buckup \(1993c\)](#) and [Melo & Oyakawa \(2015\)](#), except for fin lengths, which are measured from fin origin to the distal tip of the longest ray. Standard length (SL) is expressed in millimetres and all other measurements are expressed as percentages of SL, except subunits of the head, which are expressed as percentages of head length (HL). Measurements related to sexual dimorphism are provided independently. Counts follow [Buckup \(1993c\)](#), except for the number of horizontal scale rows above and below the lateral line, which are not particularly irregular or variable in size in Crenuchinae and thus follow [Fink & Weitzman \(1974\)](#). The posteriormost double dorsal and anal-fin rays, which are associated with a single pterygiophore, are counted as a single element. The circuli and radii patterns are examined on scales sampled from the scale-row located immediately dorsal to the longitudinal scale row containing lateral-line pores and taken from the vertical that cuts through the dorsal-fin origin. Lateral-line canal and pore terminology follow [Pastana et al. \(2019\)](#).

Frequency of each count is provided in parentheses after the respective count; asterisks indicate holotype values. Counts of teeth, vertebrae, supraneurals, procurrent caudal-fin rays, gill rakers of the first branchial arch, cephalic lateral-line branches and pores of both species are taken from cleared and stained specimens (C&S), prepared according to [Taylor & Van Dyke \(1985\)](#). Because of its small size, counts of pectoral- and anal-fin rays of the second species described herein are based on C&S specimens only. Vertebrae of the Weberian apparatus are counted as four elements and the fused PU1 + U1 of the caudal region as a single one. Pre-caudal vertebrae counts include the Weberian apparatus and the vertebrae

associated with ribs or haemal arches lacking a haemal spine. Caudal-vertebrae counts consider only vertebrae having a haemal spine. Sex of specimens was confirmed by direct observation of gonads. Colour in life was described based on freshly collected material photographed alive. Cleared and stained specimens and specimens fixed for molecular studies (MOL) are listed following the number of formalin-preserved specimens for each lot and listing their SL range. Institutional abbreviations follow Sabaj (2020).

Phylogenetic interpretations of morphological characters relevant for the monophyly of Crenuchinae are based on maximum parsimony optimizations performed on TNT v.1.5 for Windows (Goloboff & Catalano, 2016). These include only non-ambiguous characters and use the phylogenies of Buckup (1998) and Buckup (1993b), which are trees that synthesize the currently accepted hypotheses of relationships based on phenotypic data for Crenuchidae and Characidiinae, respectively.

#### MOLECULAR ANALYSES

A total of 85 individuals of the family Crenuchidae were used in the molecular analyses, representing 16 specimens of all species of Crenuchinae (including those described here) and 69 individuals of Characidiinae (sampling *Ammocryptocharax* and *Characidium*). Additionally, sequences of two non-crenuchid species were also included: *Hoplías malabaricus* (Bloch, 1794) and *Hoplerythrinus unitaeniatus* (Spix & Agassiz, 1829) (Erythrinidae). Tissue samples from species of Crenuchinae were obtained from fish collections [Instituto Nacional de Pesquisas da Amazônia (INPA), Laboratório de Genética de Peixes (LBP) and Auburn University Museum of Natural History (AUM)] and field expeditions conducted between 2015 and 2016 (in the case of the new species). All vouchers of the new species were deposited in the Museu de Zoologia da Universidade de São Paulo (MZUSP), São Paulo, Brazil. Sequences of all non-crenuchid species were obtained from the GenBank database, deposited by Pereira *et al.* (2013), Pansonato-Alves *et al.* (2014) and Scacchetti *et al.* (2015). Species of Characidiinae and Erythrinidae were used as outgroups in the phylogenetic analyses, and their identification codes, specimen vouchers and GenBank accession numbers are given in the Supporting Information, Table S1.

Total genomic DNA was extracted from muscle and fin tissues preserved in 96% ethanol with a DNeasy Blood and Tissue Kit (Qiagen), according to the manufacturer's protocol. Partial sequences of the mitochondrial gene cytochrome *c* oxidase subunit I (*COI*) were amplified by polymerase chain reaction (PCR) with the primers described by Ward *et al.* (2005) and Melo *et al.* (2011). Amplifications were

performed in a total volume of 20 µL, with 2.0 µL of 10 × buffer (10 mmol/L Tris-HCl + 15 mmol/L MgCl<sub>2</sub>), 0.6 µL MgCl<sub>2</sub> (50 nmol/L), 0.4 µL dNTPs (200 nmol/L of each), 0.4 µL each 5 mmol/L primer, 0.05 µL Platinum Taq Polymerase (Invitrogen), 15.65 µL of double-distilled water and 0.5 µL template DNA (12 ng). The thermocycler profile consisted of an initial denaturation step at 95 °C for 5 min; followed by 35 cycles of chain denaturation (30 s at 94 °C), annealing (35 s at 50 °C) and nucleotide extension (1:10 min at 72 °C), plus a final extension step at 72 °C for 7 min. The PCR products were first visually identified on a 1% agarose gel and then purified using ExoSap-IT1 (USB Corporation) following the instructions of the manufacturer. The purified PCR products were sequenced in the Instituto de Biociências, Universidade Estadual Paulista, Botucatu, Brazil, and Centro de Pesquisas sobre o Genoma Humano e Células-Tronco Instituto de Biociências, Universidade de São Paulo, São Paulo, Brazil. All sequences were read twice (forward and reverse). All sequences produced in this study were deposited in the GenBank.

Electropherograms were inspected and assembled in contigs from forward and reverse strands using GENEIOUS v.4.8.5 (<http://www.geneious.com>, Kearse *et al.*, 2012). Sequences were aligned using the MUSCLE algorithm under default parameters (<http://www.ebi.ac.uk/Tools/msa/muscle/>; Edgar, 2004). After alignment, the matrix was checked visually for obvious misalignments and to detect potential cases of sequencing error due to contamination, paralogy or pseudogenes using BioEdit v.7.0.9.0 (Hall, 1999). Nucleotide variation and substitution patterns were examined using MEGA X (Kumar *et al.*, 2018). To evaluate the occurrence of substitution saturation in the sequences, the index of substitution saturation (Iss), described by Xia *et al.* (2003) and Xia & Lemey (2009) in DAMBE 5.3.48 (Xia, 2013), was estimated.

Phylogenetic relationships among species of Crenuchinae and between this subfamily and outgroups were inferred by Bayesian inference (BI) and maximum likelihood (ML) methods. Sequences of species of the Erythrinidae were used to root the phylogenetic analyses.

The best-fit nucleotide evolution model was estimated using MRMODELTEST v.2.2 (Nylander, 2014) based on the Akaike information criterion (AIC), in conjunction with PAUP\* (Swofford, 1998). BI analysis was conducted in MRBAYES v.3.2.6 (Ronquist *et al.*, 2012). Two independent Bayesian runs of 20 million generations with four Monte Carlo Markov chains (MCMC) each were performed, saving trees each 500 generations. Chain convergence (effective sample size – ESS values > 200) was checked using the likelihood plots for each run using TRACER v.1.5.1 (Rambaut & Drummond, 2009). The potential scale reduction factor (PSRF) was also used to check

chain convergence and burn-in; values close to 1 indicate good convergence between runs (Gelman & Donal, 1992). After a graphical analysis of the evolution of the likelihood scores, and checking for the stationarity of all model parameters, the first four thousand generations (10%) were discarded as burn-in. The remaining trees were used to calculate the consensus tree and posterior probability values were calculated to determine the level of support to the Bayesian topology. The ML phylogenetic reconstructions were performed using RAxML v.8.0.24 (Stamatakis, 2014), random starting trees and a GTRGAMMA model of nucleotide substitution. One-thousand bootstrap pseudoreplicates were used to investigate the support of each node in the most likely topology. In general, bootstrap values above 75% in the ML analyses were interpreted as well supported, and in the BI analyses a posterior probability value of 0.99 was taken as a threshold. MRBAYES and RAxML analyses were performed remotely at the CIPRES Science Gateway portal (Miller *et al.*, 2010).

The automatic barcode gap discovery (ABGD; Puillandre *et al.*, 2012), a computationally efficient distance-based method of species delimitation, which seeks to quantify the location of the barcode gap that separates intra from interspecific distances (Puillandre *et al.*, 2012; Blair & Bryson, 2017), was used to delimit lineages in the subfamily Crenuchinae. Thus, ABGD analyses were run through the software command line. Default settings were used for the prior range for maximum intraspecific divergence (0.001, 0.1). Results were compared using both JC69 and K80 corrected distances and minimum slope increase (X) of 1.0.

## RESULTS

### MOLECULAR RESULTS

The sequences from 87 specimens (Table 1; Supporting Information, Table S1) resulted in a matrix for the mitochondrial gene *COI* with 666 base pairs (bp) from which 386 positions were conserved, 266 were variable and 250 positions were informative. The sequences did not have insertions, deletions, stop-codons or sequencing errors due to contamination. The Iss index was significantly lower than the Iss.c (critical substitution saturation index), indicating no saturation in both transitions and transversions, and in both asymmetrical (Iss.cAsym) and symmetrical (Iss.cSym) topologies. The best-fit model of evolution estimated by MrModelTest was GTR+I+G. Both phylogenetic methods (BI and ML) produced gene trees with similar topologies (Fig. 1A, B, respectively), in which Crenuchinae are recovered as a strongly supported monophyletic group, including two genera (*Crenuchus* and *Poecilocharax*) and five species (*C. spilurus*, *P. bovaliorum*, *P. weitzmani*, and the two new species described in this study, *P. callipterus* and *P. rhizophilus*) (Fig. 1). Both the BI and ML analyses recovered *Poecilocharax* as monophyletic but with low support. Overall, the relationships among species of *Poecilocharax* were not clearly resolved except for the clade (*P. callipterus*, *P. rhizophilus*), which had high statistical support in both hypotheses (1 of posterior probability and 75% of bootstrap).

The ABGD analyses suggested a total of nine species based on initial partitioning over a range of prior values for maximum intraspecific divergence. Results based on JC69 and K80 distances were identical, indicating

**Table 1.** Species, lot number, voucher and GenBank accession numbers for the representatives of Crenuchinae used in this study.

| Species                          | Lot number      | Voucher    | GenBank number ( <i>COI</i> ) |
|----------------------------------|-----------------|------------|-------------------------------|
| <i>Crenuchus spilurus</i>        | LBP 4275        | LBP 23869  | KF914693                      |
| <i>Crenuchus spilurus</i>        | INPA-ICT 049574 | P 29500    | ON059686                      |
| <i>Crenuchus spilurus</i>        | INPA-ICT 049574 | P 29501    | ON062375                      |
| <i>Poecilocharax bovaliorum</i>  | AUM 2182        | AUM 2182   | ON042212                      |
| <i>Poecilocharax callipterus</i> | MZUSP 117568    | MZict 3037 | ON067495                      |
| <i>Poecilocharax callipterus</i> | MZUSP 117568    | MZict 3038 | ON067498                      |
| <i>Poecilocharax rhizophilus</i> | MZUSP 121651    | MZict 6191 | ON076904                      |
| <i>Poecilocharax rhizophilus</i> | MZUSP 121651    | MZict 6192 | ON067501                      |
| <i>Poecilocharax rhizophilus</i> | MZUSP 121651    | MZict 6193 | ON067502                      |
| <i>Poecilocharax rhizophilus</i> | MZUSP 121651    | MZict 6194 | ON067500                      |
| <i>Poecilocharax weitzmani</i>   | LBP 7078        | LBP 40500  | HQ289701                      |
| <i>Poecilocharax weitzmani</i>   | INPA-ICT 049036 | P 29842    | ON063015                      |
| <i>Poecilocharax weitzmani</i>   | INPA-ICT 049036 | P 29843    | ON063044                      |
| <i>Poecilocharax weitzmani</i>   | INPA-ICT 042889 | P 29425    | ON062533                      |
| <i>Poecilocharax weitzmani</i>   | INPA-ICT 042889 | P 29426    | ON063012                      |
| <i>Poecilocharax weitzmani</i>   | INPA-ICT 042889 | P 29427    | ON063016                      |

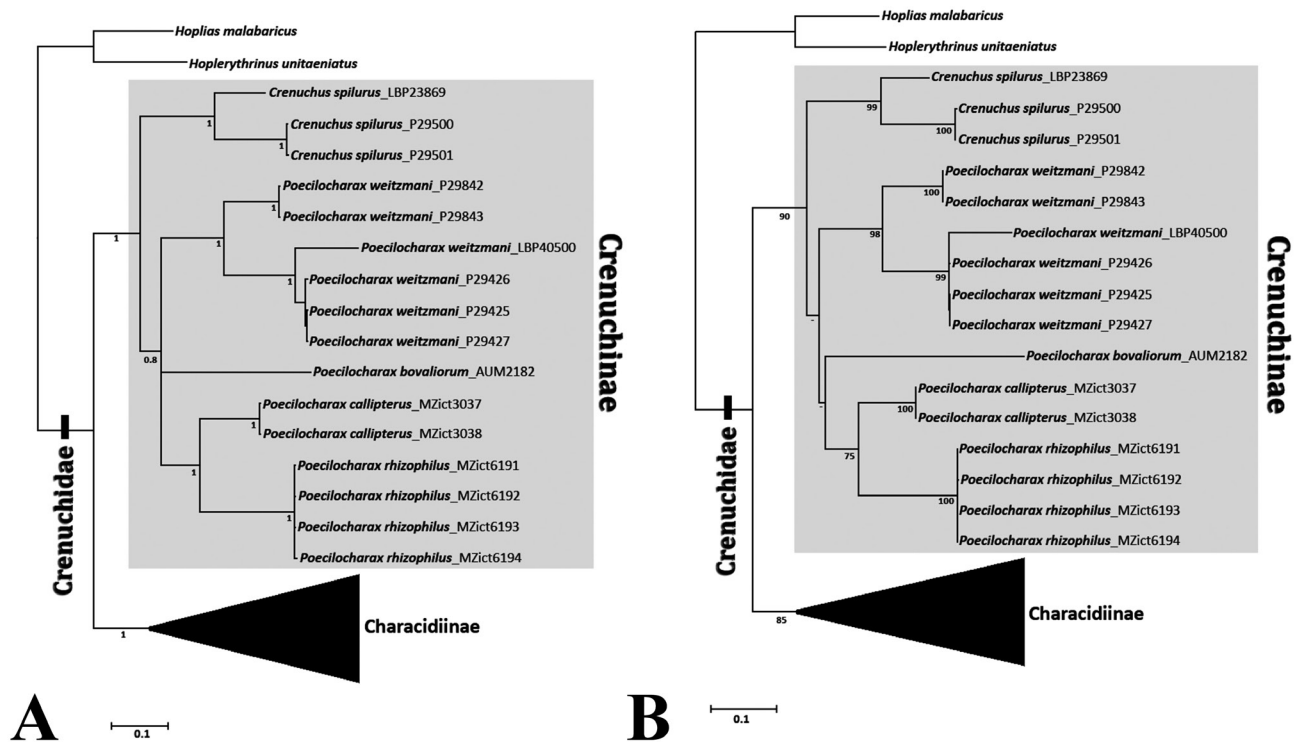

**Figure 1.** Abbreviated phylogenetic trees of Crenuchidae obtained in this study based on mitochondrial gene cytochrome *c* oxidase subunit I (*COI*, 666 bp), indicating the monophyly of Crenuchinae (highlighted) and the relationships among its representatives. A, Bayesian tree, numbers at branches are posterior probabilities; B, maximum likelihood tree, numbers at branches are bootstrap values. Values below 75% (-) are not shown.

that there is no doubt about the species boundaries based on the analysed specimens, although there is a split within both *Crenuchus spilurus* and *Poecilocharax weitzmani* (Fig. 2). Similar results were obtained by using the 2% standard barcode threshold of genetic distance calculated based on the *COI* matrix. They indicate a high genetic divergence among specimens of both *Crenuchus spilurus* and *Poecilocharax weitzmani*, 10.3 and 11.1%, respectively. The rate of genetic variation ranges from 16.9 to 25.2% among species of *Poecilocharax* (Supporting Information, Table S2).

#### TAXONOMY

GENUS: *POECILOCHARAX* EIGENMANN, 1909

*Type species: Poecilocharax bovalii* Eigenmann, 1909 (by original description); now *Poecilocharax bovaliorum* (mandatory name correction: Fricke *et al.*, 2021b).

*Diagnosis: Poecilocharax* can be distinguished from the only other crenuchin genus, *Crenuchus*, by the following morphological characteristics: (1) adipose fin absent (vs. present); (2) pelvic-fin rays eight, with the following formula: i,seven or i,six,i (vs. pelvic-fin rays

nine or ten, with formula: i,eight or i,nine); and (3) posterior terminus of maxilla not surpassing vertical through anterior margin of the orbit (vs. posterior terminus of maxilla extending posterior to orbital margin, reaching vertical through pupils).

#### *POECILOCHARAX CALLIPTERUS* SP. NOV.

(FIGS 3–9; TABLE 2)

*Zoobank registration:* urn:lsid:zoobank.org:act:A55ADF69-B919-415B-8BAB-38F7516AB9AD.

*Holotype:* MZUSP 121650, male, 30.9 mm SL, BRAZIL, Amazonas State, Apuí, tributary of Rio Canadá, Rio Juma, Rio Aripuanã drainage, Rio Madeira Basin, road AM 174 between Apuí and Novo Aripuanã towns, 6°51'36''S 59°58'36''W, 140 m above sea level (a.s.l.), 23 June 2015, W. Ohara and V. Abrahão (collectors).

*Paratypes:* BRAZIL, Amazonas State, Apuí. MZUSP 117568 (43, 19.1–31.2 mm SL; 2 C&S, 23.3–28.1 mm SL; 3 MOL, 23.9–29.0 mm SL); INPA 59405 (15, 23.0–29.6 mm SL); MCP 54291 (15, 21.7–28.1 mm SL), MNRJ 51747 (10, 22.7–28.4 mm SL), same data as

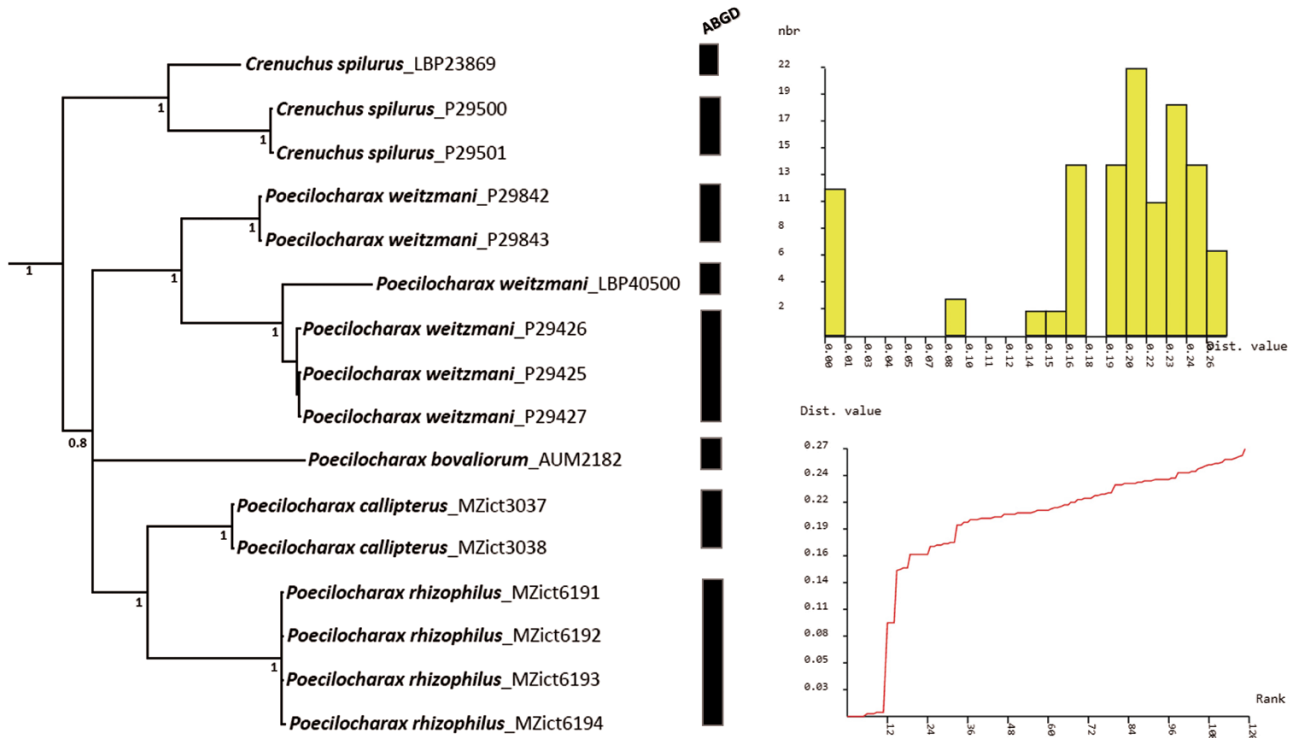

**Figure 2.** Results from ABGD analysis on Crenuchinae data shown in the IB topology. Analyses were run with a minimum slope increase (X) of 1.0. Distances were calculated based on the Kimura 2-parameter (K80) model. Graphs indicate the histogram of distances (right, above) and ranked distances (right, below).

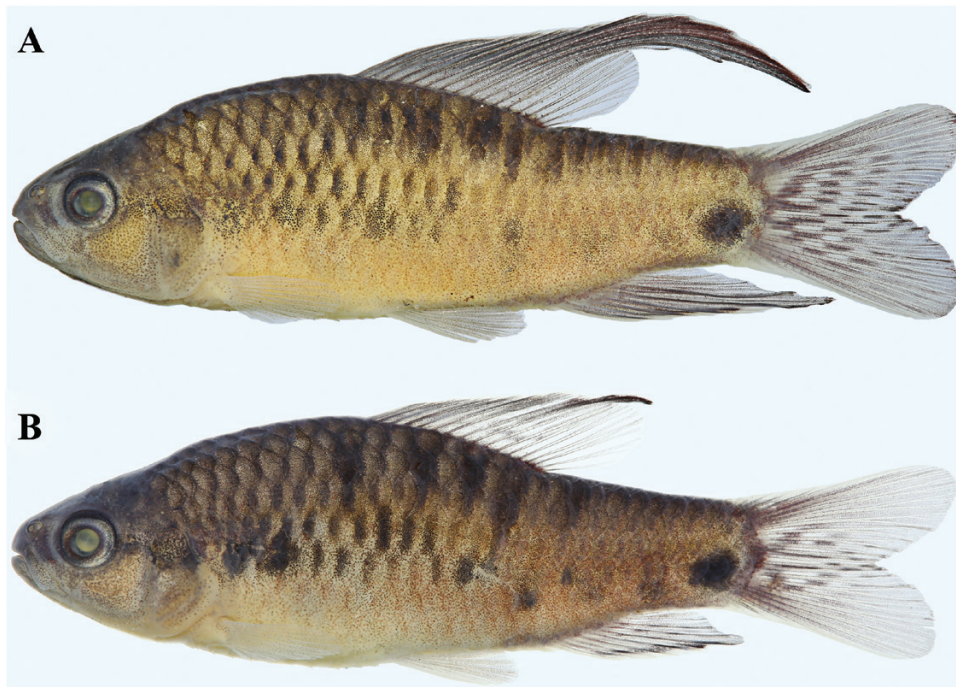

**Figure 3.** *Poecilocharax callipterus* sp. nov.: A, holotype, male, 30.9 mm SL, MZUSP 121653; B, paratype, female, 27.7 mm SL, MZUSP 117568.

**Table 2.** Morphometric data for holotype and paratypes (range) of *Poecilocharax callipterus* sp. nov. ( $N = 25$ ). SD = standard deviation

| Characters                           | Holotype | Range       | Median<br>± SD |
|--------------------------------------|----------|-------------|----------------|
| Total length (mm)                    | 39.83    | 30.6–39.9   | 36.9 ± 2.1     |
| Standard length (mm)                 | 30.91    | 23.5–31.2   | 28.4 ± 1.8     |
| <b>Percentage of standard length</b> |          |             |                |
| Head length                          | 26.4     | 25.9–30.2   | 27.6 ± 1.1     |
| Prepectoral distance                 | 30.3     | 27.8–32.1   | 30.4 ± 0.9     |
| Pectoral-fin height                  | 17.1     | 15.5–19.5   | 17.5 ± 0.9     |
| Predorsal distance                   | 51.4     | 47.5–51.8   | 49.7 ± 1.1     |
| Dorsal-fin height<br>females         | -        | 38.4–49.3   | 44.2 ± 6.7     |
| Dorsal-fin height<br>males           | 63.7     | 51.3–67.5   | 60.1 ± 4.3     |
| Dorsal-fin base                      | 26.0     | 23.9–27.2   | 25.2 ± 0.9     |
| Prepelvic distance                   | 54.4     | 50.8–55.4   | 53.2 ± 1.2     |
| Pelvic-fin height                    | 19.5     | 17.1–22.3   | 19.2 ± 1.3     |
| Pre-anal distance                    | 72.4     | 71.0–76.2   | 73.7 ± 1.6     |
| Anal–apex distance<br>females        | -        | 98.4–104.0  | 102.7 ± 3.3    |
| Anal–apex distance<br>males          | 111.7    | 104.0–112.4 | 109.7 ± 2.4    |
| Anus to anal-fin<br>distance         | 3.3      | 1.9–3.9     | 3.1 ± 0.5      |
| Anal-fin height<br>females           | -        | 24.7–31.7   | 28.6 ± 2.2     |
| Anal-fin height<br>males             | 38.7     | 31.9–39.8   | 36.8 ± 2.7     |
| Anal-fin base                        | 13.1     | 11.1–14.1   | 12.5 ± 0.8     |
| Peduncle length                      | 17.7     | 15.7–18.5   | 17.0 ± 0.7     |
| Body depth at<br>dorsal-fin origin   | 33.2     | 30.4–33.4   | 31.9 ± 0.9     |
| Body depth at<br>anal-fin origin     | 24.5     | 22.3–24.8   | 23.8 ± 0.6     |
| Body depth at caudal<br>peduncle     | 16.9     | 14.7–16.9   | 15.6 ± 0.6     |
| Body width                           | 13.6     | 12.1–14.6   | 13.4 ± 0.6     |
| <b>Percentage of head length</b>     |          |             |                |
| Snout length                         | 28.8     | 24.6–29.8   | 27.3 ± 1.3     |
| Snout–maxillary<br>length            | 35.4     | 31.8–37.8   | 34.7 ± 1.8     |
| Anterior naris-orbit                 | 13.8     | 10.7–15.0   | 13.2 ± 1.2     |
| Posterior naris-orbit                | 9.5      | 9.4–12.1    | 10.2 ± 0.7     |
| Cheek                                | 11.9     | 9.3–13.4    | 11.2 ± 0.9     |
| Orbital diameter                     | 33.4     | 30.0–35.0   | 31.5 ± 1.2     |
| Interorbital<br>diameter             | 28.8     | 24.3–30.5   | 28.2 ± 1.4     |

the holotype. MZUSP 121653 (17, 24.6–30.6 mm SL; 3 C&S, 29.1–31.6 mm SL), same locality as the holotype, 9 October 2016, O. Oyakawa, W. Ohara, M. Pastana and T. Teixeira (collectors).

**Diagnosis:** *Poecilocharax callipterus* can be promptly distinguished from its congeners by the presence of a single, conspicuous, dark spot ventrally positioned on caudal peduncle (vs. absence); by the absence of a dark midlateral stripe on the body (vs. presence); and by the presence of dark blotches on the flank (vs. absence). Additionally, *Poecilocharax callipterus* can be distinguished from its congeners, except *P. bovaliorum*, by having the anterior and posterior nares separated only by a narrow skin fold (vs. the anterior and posterior nares separated from each other by a distance equal or greater than anterior nostril diameter; see Géry, 1965: fig. 11); and by the presence of a nasal flap (vs. absence). *Poecilocharax callipterus* can be further distinguished from *P. bovaliorum* by having a long dorsal-fin filament in mature males (vs. dorsal fin not particularly elongated in mature males).

**Description:** Morphometric data are presented in Table 2. Largest specimen reaching 31.2 mm SL. Body moderately compressed and deep (Fig. 3). Greatest body depth approximately at vertical through tip of pectoral fin. Dorsal profile convex between tip of snout and posterior region of frontal bone; slightly concave or straight from that point to tip of supraoccipital spine; convex from supraoccipital spine to base of last dorsal-fin ray; straight or slightly concave between that point to origin of anterior most dorsal procurrent caudal-fin ray. Ventral profile convex between anterior tip of dentary and anal-fin origin; slightly convex at anal-fin base; almost straight between terminus of anal-fin base to origin of anteriormost ventral procurrent caudal-fin ray. Body elliptical in cross-section at pectoral-fin origin, broader ventrally and gradually more compressed toward caudal-fin base.

Mouth terminal, jaws vertically aligned anteriorly. Snout gently rounded, shorter than eye diameter. Distal tip of maxilla barely reaching anterior margin of orbit. Orbital margin free. Cheek depth about half of eye diameter. Anterior and posterior nares close to each other, separated by skin flap. Anterior naris tubular and posterior crescent-shaped. Frontals concave anteriorly, with wide depression between orbits extending from posterior portion of mesethmoid bone to anterior portion of epiphyseal branch of supraorbital canal (Fig. 4). Concavity allocating frontal organ. Each frontal containing one relatively large foramen for passage of nerve branch ophthalmicus superficialis that innervates the organ. Foramen located medial to supraorbital canal of cephalic lateral line, anterior to epiphyseal branch of supraorbital canal (Fig. 4). Supraorbital bone absent. Infraorbitals one to six present (Fig. 5), with infraorbitals three and four occasionally fused to each other; antorbital bone located anterodorsally to first infraorbital.

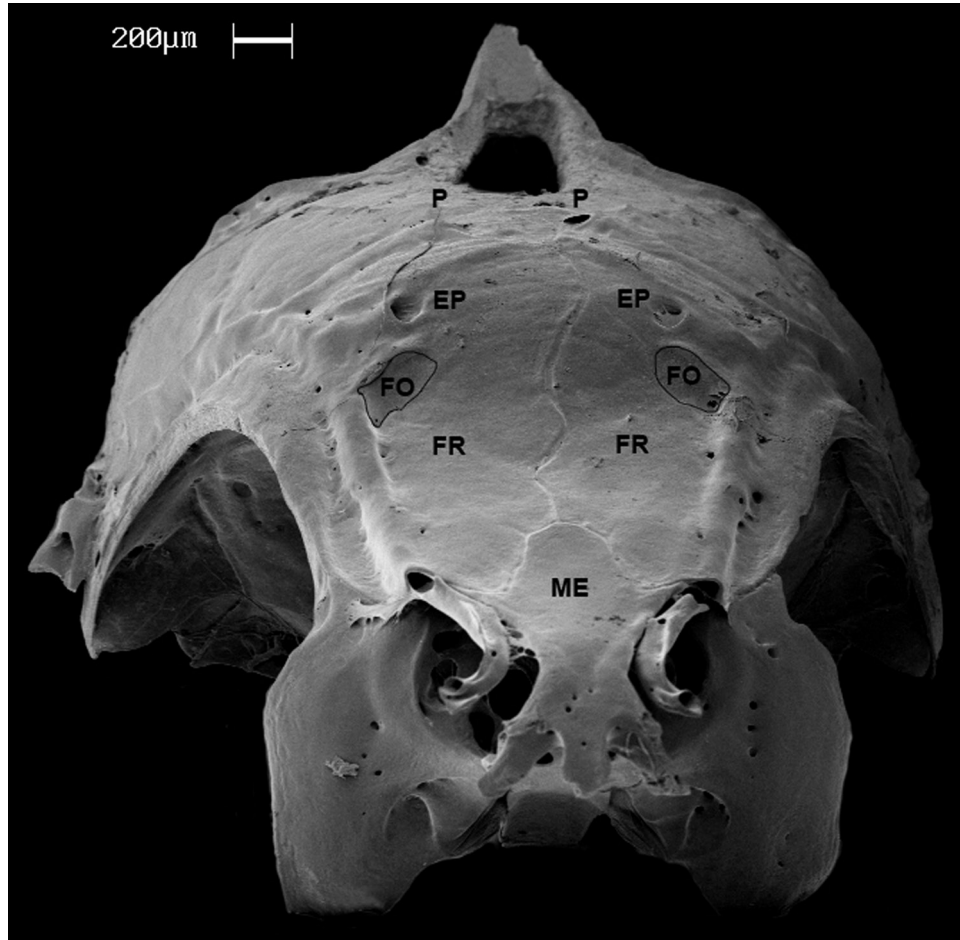

**Figure 4.** SEM photograph of the neurocranium of *Poecilocharax callipterus* sp. nov. in frontal view, paratype, male, 28.1 mm SL. Epiphyseal branch of the supraorbital laterosensory canal (EP), foramina (FO), frontal bone (FR), mesethmoid (ME) and parietal branch of supraorbital laterosensory canal (P).

Pseudotympanum present, underneath third to fifth scales of longitudinal line.

Dentary teeth in one row with seven to 13 (5) conical or tricuspid teeth. Premaxillary teeth in single row with ten or 11 (5) conical to tricuspid teeth. Premaxillary and dentary teeth increasing in size toward symphysis. Maxillary teeth absent (Fig. 6). Ectopterygoid with small teeth. Branchiostegals five (5); four attached to anterior ceratohyal and one to posterior ceratohyal. First arch with three (5) gill rakers on hypobranchial, seven (1), eight (1), nine (2) or ten (1) on ceratobranchial, one (5) on cartilage between ceratobranchial and epibranchial, and six (1) or eight (4) on epibranchial. Gill rakers slightly shorter than brachial filaments. Supraneurals three (5), small and rod-like dorsally positioned and anterior to first neural spine (5).

Laterosensory system developmentally truncated, tubules opening in individual pores (i.e. never forming subpores). Supraorbital canal associated with nasal, frontal and parietal bones. Epiphyseal

and parietal branch of supraorbital canal present (Fig. 4). Supraorbital lacking connection to otic canal, falling short near posterolateral margin of frontal bone. Infraorbital canal developmentally truncated, restricted to infraorbital plates 1, 2 (Fig. 5) and variably associated with infraorbital plates 5, 6. Otic canal present, associated with anterior portion of pterotic. Post-otic canal running along pterotic, extrascapular, post-temporal and supracleithrum. Supratemporal canal associated with extrascapula and posterior margin of parietal bone, running dorsomedially and opening in a pore near cranial fontanel. Preopercular canal extending along entire extension of pre-opercular bone, continuous with mandibular canal. Mandibular canal associated with the anguloarticular and dentary bones.

Scales cycloid, circuli distributed over entire scale surface. Two to four parallel and well-defined radii present on posterior scale surface. Trunk lateral-line perforating a single scale, either fifth (3) or sixth\* (19) scale of the longitudinal series (Fig. 7). Perforated scale



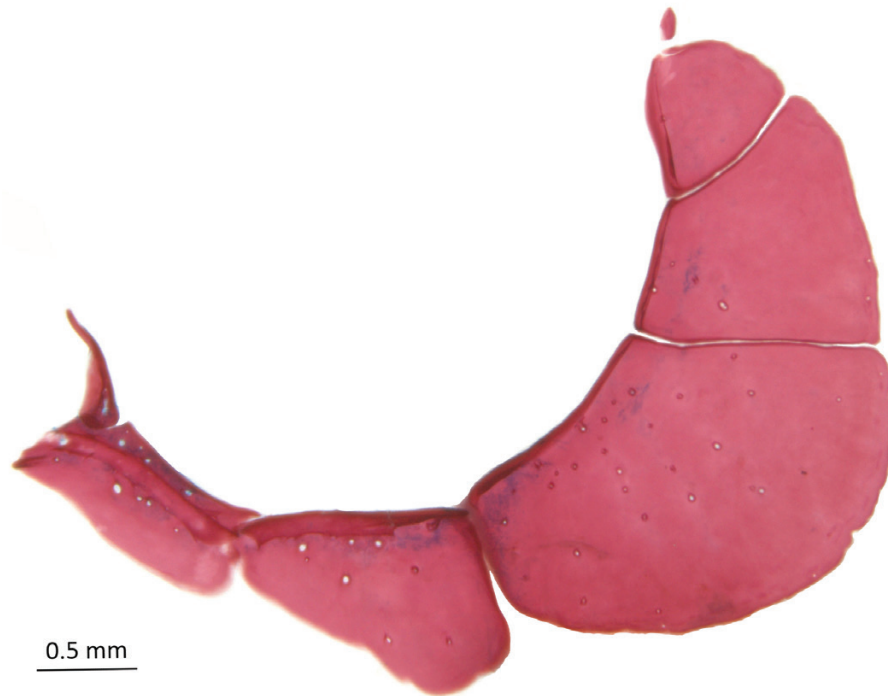

**Figure 5.** Infraorbital series of *Poecilocharax callipterus* sp. nov., depicting antorbital bone and infraorbitals 1–6, MZUSP 117568, paratype, male, 28.1 mm SL, left lateral view.

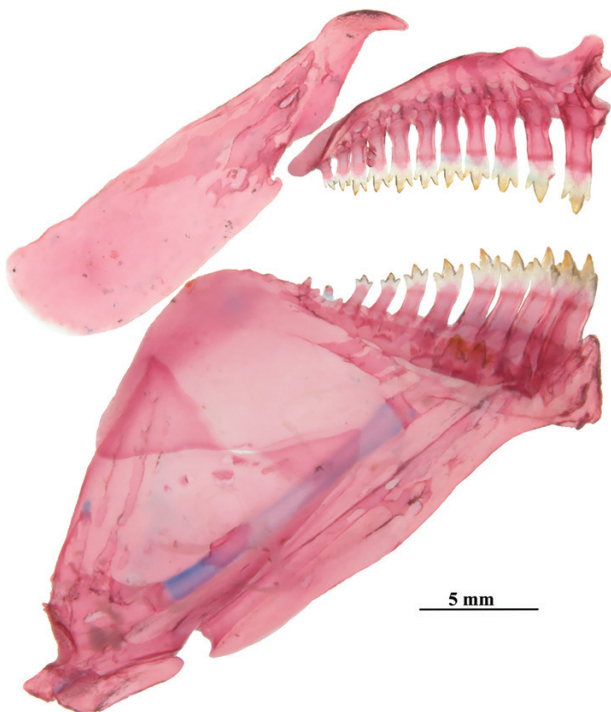

**Figure 6.** *Poecilocharax callipterus* sp. nov., left medial view of premaxilla, maxilla and dentary, MZUSP 117568, paratype, male, 28.1 mm SL.

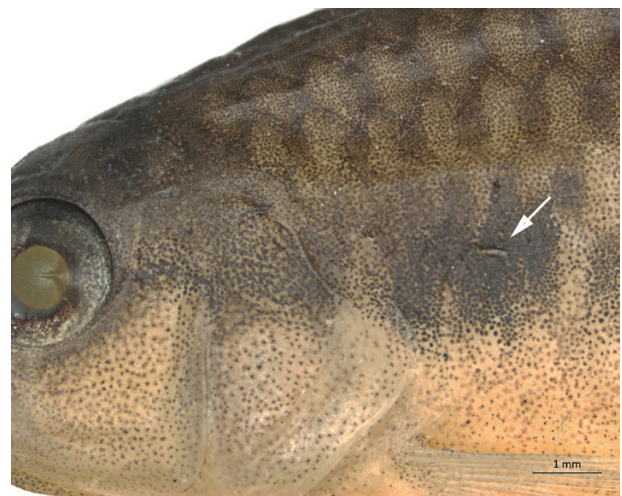

**Figure 7.** *Poecilocharax callipterus* sp. nov., lateral line with a single perforated scale, MZUSP 117568, paratype, 27.5 mm SL.

inconspicuous or covered by skin in some specimens. Longitudinal scale series, including perforated scale, 25 (1), 26 (3), 27 (8), 28\* (13) or 29 (1). Horizontal scale rows above lateral line four\* (26). Horizontal scale rows below lateral line three\* (26). Scale rows around caudal peduncle 14\* (26). Predorsal scales

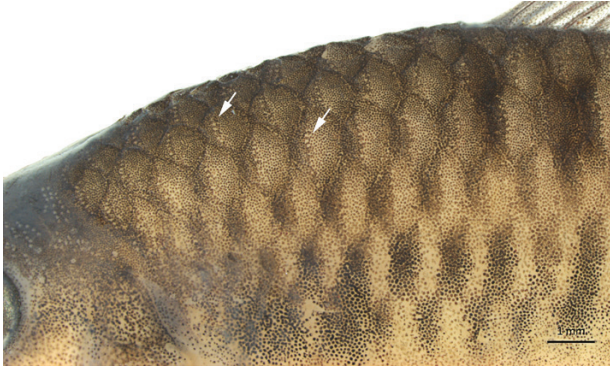

**Figure 8.** Superficial neuromasts (white arrows) on lateral body scales of *Poecilocharax callipterus* sp. nov., MZUSP 117568, paratype, 29.4 mm SL.

series six (8), seven\* (14) or eight (2). Isthmus scaled. Scales between anus and anal fin, none (1), one\* (18) or two (6). Superficial neuromasts arranged vertically on basal portion of each scale, more conspicuous on anterior half of body (Fig. 8).

Pectoral-fin rays ii, nine (2) or 10\* (22). Tip of longest pectoral-fin ray slightly anterior to vertical through dorsal-fin origin. Pelvic-fin rays i, seven\* (24). Tip of longest pelvic-fin rays slightly anterior to vertical through insertion of last dorsal-fin ray. Dorsal-fin rays iii, 13 (1), iii, 14 (2), iv, 12 (1), iv, 13\* (13) or iv, 14 (7). Dorsal-fin ray length variable (Figs 3, 9; see 'sexual dimorphism'). Dorsal-fin origin nearer snout than caudal-fin base, slightly anterior to vertical through pelvic-fin origin. First dorsal-fin pterygiophore located behind neural spine of 18<sup>th</sup> (5) vertebra. Anal-fin rays ii, seven (5), ii, eight (9), iii, seven\* (8), iii, eight (3) with variable length (Figs 3, 9; see 'sexual dimorphism'). Anal-fin origin posterior to vertical through base of last dorsal-fin ray. Single row of one to three scales covering base of anteriormost anal-fin rays. First anal-fin pterygiophore located behind neural spine of 18<sup>th</sup> (5) vertebra. Principal caudal-fin rays i8, 8i (1), i9, 8i\* (25), i9, 7i (1) or i10, 8i (2). Caudal fin with one to three large scales covering basal portion of each lobe. Dorsal procurrent caudal-fin rays five (1) or six (4), and ventral procurrent caudal-fin rays four (1) or five (4). Hypurals one and two fused to each other; hypurals five and six fused to each other in some specimens (2); hypurals three and four always autogenous. Adipose fin absent. Total vertebrae 29 (1) or 30 (4); precaudal vertebrae 19 (5), caudal vertebrae ten (1) or 11 (4).

*Colour in alcohol:* Overall background coloration of head and body beige to brown, darker dorsally (Fig. 3). Snout, premaxilla, tip of dentary, maxilla, antorbital and infraorbitals one and two densely covered by small, dark chromatophores. Ventral portion of head, cheeks, gular and opercular regions

with scattered chromatophores. Eyes mostly dark, with brown pigments surrounding pupils. Suborbital stripe absent. Guanine deposits on head not visible in alcohol preserved specimens. Dark chromatophores densely distributed along dorsal and dorsolateral scale rows. Scales of anterior-dorsal half of body with chromatophores disposed vertically, mostly on anterior margin of scales, forming small, dark blotches on each scale. Scale borders forming a conspicuous reticulate pattern on anterior-dorsal half of body. Ventral portion of the body lighter, abdominal region lacking pigment, except for few sparse dark chromatophores. Body somewhat mottled, having nine to 12 conspicuous dark blotches. First blotch somewhat round, variably present immediately posterior to the opercle, followed by two other blotches. Midline of body often having blotches irregular in shape with undefined borders. A series of two to five vertically elongated, dark blotches encompassing one scale horizontally and three to four scales vertically, positioned below the dorsal-fin base. Midbody with two to three dark blotches: one located at the abdominal region, one or two at the anal-fin base. Midbody blotches highly variable in number, position and conspicuity among specimens, with blotches occasionally forming a discontinuous dark stripe; none to four dark spots or blotches positioned above anal-fin base. Caudal peduncle with one conspicuous dark spot, located on ventral half of peduncle, near the base of ventral caudal-fin rays (referred hereafter as asymmetrical caudal-peduncle spot), encompassing two or two and a half scales horizontally and one to one and a half vertically (Fig. 3). Spot remarkably similar to that present in *Crenuchus spilurus* (see Discussion).

Dorsal-fin coloration sexually dimorphic. Dorsal fin mostly dusky in adult males, with dark pigment more concentrated distally on rays and interradial membranes; dorsal-fin filament densely pigmented. Remaining dorsal-fin area with melanophores sparsely distributed, more concentrated in the distal portions of the fin. Posteriormost dorsal-fin rays hyaline. Dorsal fin of females and immature individuals has less pigmentation, with melanophores sparsely distributed on border of rays, more concentrated on distal half of anteriormost rays; dorsal-fin filament, whenever present, short and dark. Pectoral fins predominantly hyaline in both sexes, with few scattered dark chromatophores present along margins of rays. Pelvic fin varying from hyaline in females and juveniles or dusky in adult males, with scattered chromatophores along fin-rays and membranes. Anal-fin coloration sexually dimorphic; adult males with dusky anal-fin, and dark chromatophores along border of rays and membranes. One horizontal dark stripe present distally on the anal-fin, encompassing the first five anal-fin rays. Dark stripe contrasting with an unpigmented anal-fin margin. Anal fin of females and immature

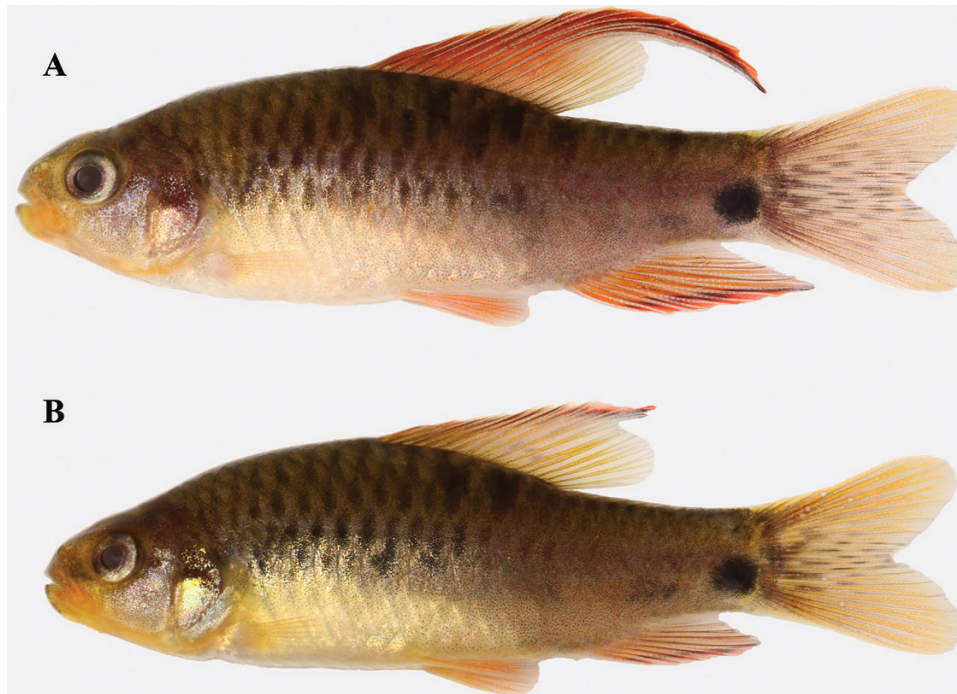

**Figure 9.** *Poecilocharax callipterus* sp. nov., immediately after capture, paratypes: A, male, 30.6 mm SL, MZUSP 121653; B, female, 27.2 mm SL, MZUSP 117568.

specimens considerably less pigmented. Caudal fin with concentration of dark chromatophores on upper and lower caudal-fin base, and a series of small and elongated spots along interradiation membrane of middle caudal-fin rays. Caudal-fin spots more numerous in adult males.

*Colour in life:* Overall body coloration yellow to red, darker dorsally (Fig. 9). Abdominal region yellow with silvery hue. Adult males with a more vivid coloration. Dark blotches on body as described in ‘Colour in alcohol’, usually visible in live specimens. Guanine deposits on cheeks, ventral portion opercular bone and along sub- and interopercle. Lower half of opercle and infraorbitals two to four silvery, golden or red. Upper half of opercle transparent, red gill filaments visible through bone in some individuals. Upper and lower jaw mostly yellow; orange hue present in large adult males.

Dorsal-fin coloration sexually dimorphic (Fig. 9). Adult males with dorsal fin orange to red along first 12 to 14 dorsal-fin rays, chromatophores more concentrated on interradiation membranes. Tip of dorsal-fin filament strongly red pigmented. Females and immature specimens of both sexes with dorsal fin mostly yellow, with chromatophores concentrated on fin-rays. Pectoral fins predominantly pale orange to yellow in both sexes. Pelvic fins yellow to orange, more intensely coloured in adult males. Anal-fin coloration sexually dimorphic. Adult males with orange to red fin, chromatophores

concentrated on interradiation membranes of first nine anal-fin rays; and with an evident horizontal red stripe located on the leading margin of first five to six anal-fin rays. Females and immature specimens of both sexes with anal fin yellow to orange, less vivid than adult males, with red stripe absent or inconspicuous. Caudal fin pale red to yellowish in both sexes.

*Sexual dimorphism:* Dorsal-fin filament length sexually dimorphic. Dorsal-fin height of adult males ranging from 51.3 to 67.5% of SL with a long dorsal-fin filament projecting from the eighth to 11<sup>th</sup> dorsal-fin rays. In some specimens, depressed filament reaching the proximal half of the upper caudal-fin lobe (Figs 3, 9). Adult females with much shorter dorsal-fin filaments, projecting from the eighth to tenth dorsal-fin rays, with tip of filament never reaching base of caudal-fin rays. Adult males with longer anal-fin, tip of longest ray reaching to distal half of ventralmost principal caudal-fin ray. Adult females with shorter anal-fin rays, tip of longest ray never reaching principal caudal-fin rays (Figs 3, 9).

Adult males more vividly coloured than females (Fig. 9). Coloration in live orange to red, with dorsal and anal fins more intensely pigmented. Adult males with inconspicuous red stripe on leading margin of dorsal-fin filaments and conspicuous band along first six anal-fin rays (Fig. 9A). Females and immature specimens of both sexes paler, with overall yellow to gold coloration,

and dorsal, pelvic and anal fins yellow to orange. Dorsal and anal fins lacking red stripe on leading margin (see 'Colour in life' section for further details) (Fig. 9B). Bony processes were not observed on fin-rays of either sex.

**Etymology:** The specific name *callipterus* is Latinized from the Greek κάλλι [kalli], beauty, and πτερόν [pteron], feather or wing, in reference to the vivid coloration of the dorsal-fin of adult males. It is a declinable adjective.

**Geographic distribution:** *Poecilocharax callipterus* is known from the type locality, a black water tributary of the Rio Juma, in the Rio Aripuanã drainage, Rio Madeira Basin, Apuí Municipality, Amazonas State, Brazil (Fig. 10).

**Ecological notes:** The type locality of *Poecilocharax callipterus* is a small, black-water stream (Fig. 11).

The stream is located at an elevation of 140 m, is 1–3 m wide, 0.3–1.0 m deep, with slow-flowing water and a predominantly rocky substrate. The stream runs across a small Cerrado (= savannah) enclave into the Amazon Forest. Specimens were collected during daytime and were in low abundance. Different environments and habitats were explored, but the new species was captured specifically among aquatic grasses or roots near the margins. Schools were not observed. Individuals of *P. callipterus* were observed during the night in deeper portions of the stream (1 m) and near the marginal vegetation or between subaquatic roots of riparian vegetation (Fig. 11). Several small streams were sampled in two field expeditions carried out in 2015 and 2016, but only the type locality had aquatic vegetation and a rocky bottom. Thus, we infer that *P. callipterus* may have specific habitat requirements. At the type locality of *P. callipterus*, characids are absent and this is apparently the only species to forage the medium-upper water column.

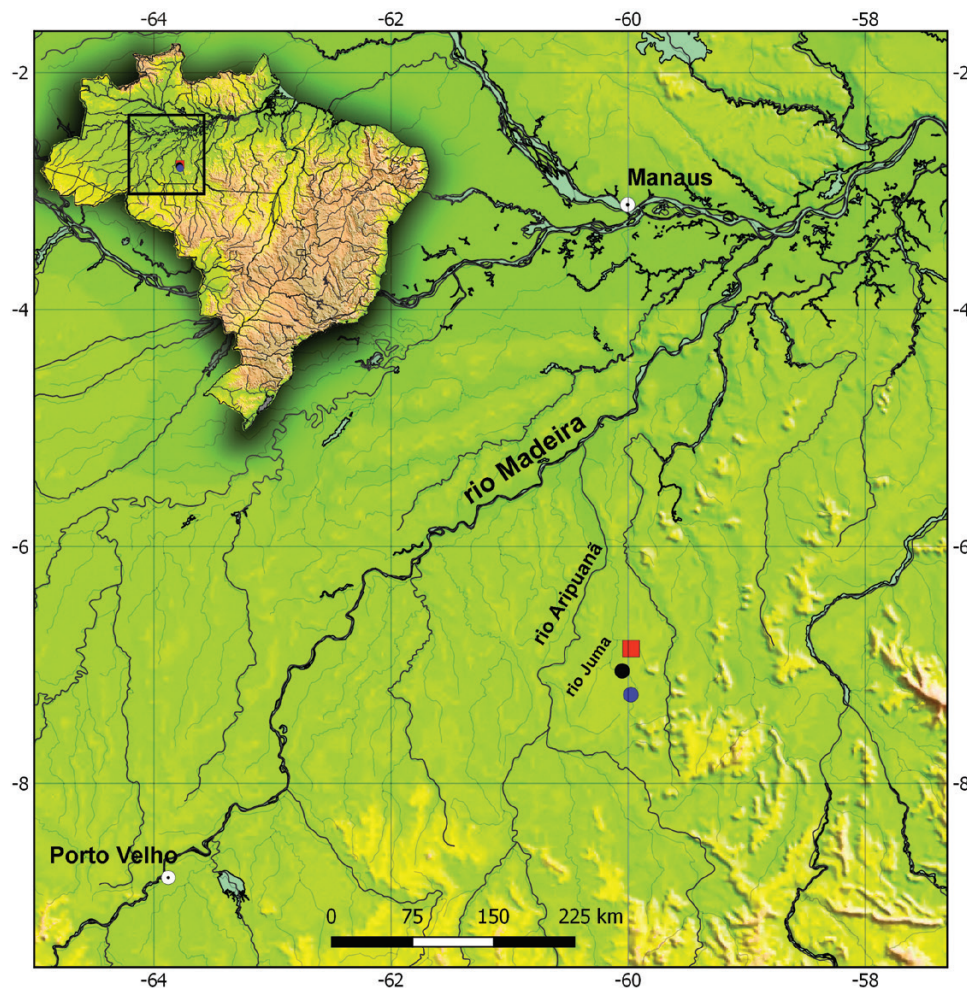

**Figure 10.** Type-locality (red square) of *Poecilocharax callipterus* sp. nov. and *P. rhizophilus* sp. nov. (blue dot), tributary of the Rio Juma, Rio Aripuanã drainage, Rio Madeira Basin, Apuí, Amazonas, Brazil.

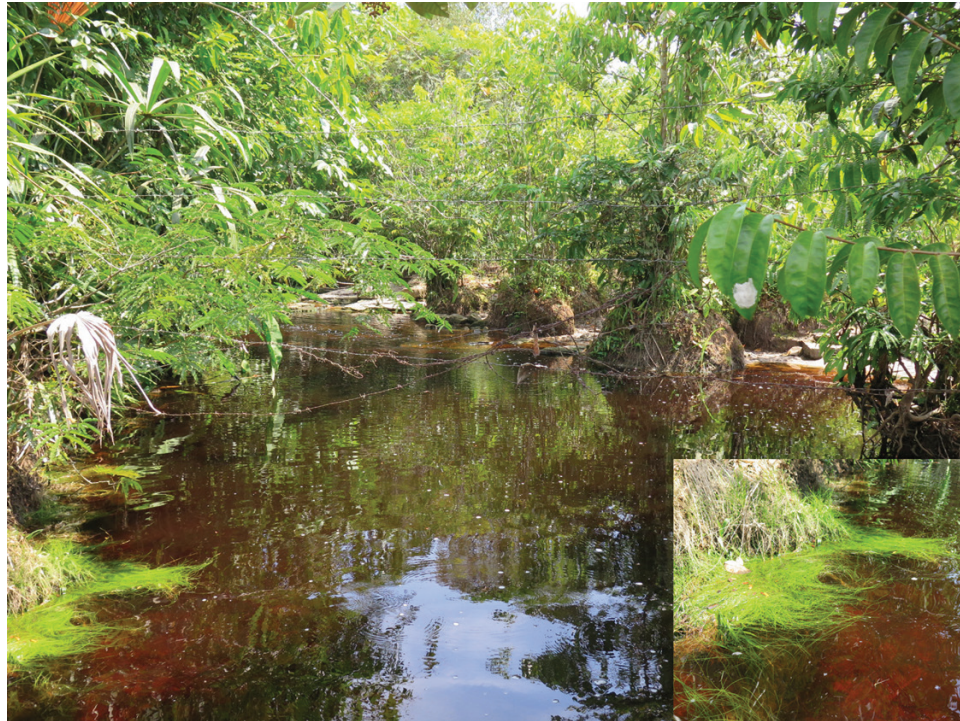

**Figure 11.** Tributary of Rio Canadá, Rio Juma drainage, Rio Aripuanã Basin, Apuí, Amazonas, Brazil, type-locality of *Poecilocharax callipterus* sp. nov. In detail the microenvironment where *P. callipterus* sp. nov. was captured.

Fish species sampled syntopically in the type locality were *Callichthys callichthys* (Linnaeus, 1758), *Erythrinus erythrinus* (Bloch & Schneider, 1801) and three unidentified species of *Aequidens* Eigenmann & Bray, 1894, *Brachyhyopomus* Mago-Leccia, 1994 and *Lepthoplosternum* Reis, 1997. The stomach content analysis of five paratypes revealed the presence of filamentous algae, nematodes, chironomids, Cladocera, sediment and sand. One male and two female specimens collected in October had gonads moderately developed.

**Conservation assessment:** The risk of extinction for this species is preliminarily assessed as critical. *Poecilocharax callipterus* is a species of restricted geographical range, known only from one small, black-water tributary of the Rio Juma (Rio Aripuanã drainage), near the city of Apuí. The new species was discovered in a stream that crosses the highway AM-174 (linking Apuí and Novo Aripuanã), a region surrounded by a small and relatively degraded forest area currently being occupied by pasture. There are three Conservation Units surrounding the type locality (Floresta Nacional do Jatuarana to the south, Parque Nacional do Acari to the east and Floresta Nacional do Aripuanã to the west), and some still preserved,

unprotected areas near the type locality. However, the new species was not found elsewhere other than the type locality, despite intense collecting efforts, and the presence of *P. callipterus* within these Conservation Units or in surrounding areas remains uncertain but seems unlikely. Sampling activities took place in 2015 and 2016, and at that time, the type locality did not present signs of silting, water turbidity and erosion on the banks (Fig. 11). However, the territory of Apuí has been intensely impacted by deforestation ever since the discovery of the new species, and it is currently ranked in second place in a list of Brazilian municipalities with greatest loss of native forest (Fonseca *et al.*, 2021). The Area of Occupation of the new species is estimated as 4 km<sup>2</sup> (B2). A continuous decline in the habitat quality is expected and inferred based on erosion, silting and increased turbidity, as results of continued high deforestation in the region. The number of locations is one. There are no estimates of population size or population decline. For these reasons, *P. callipterus* is tentatively assessed as Near Threatened (NT) approaching Critically Endangered (CR) by criterion B2ab(iii) according to the International Union for Conservation of Nature (IUCN) categories and criteria (IUCN Standards and Petitions Sub-Committee, 2019).

***POECILOCHARAX RHIZOPHILUS* SP. NOV.**

(FIGS 12–14; TABLE 3)

*Zoobank registration:* urn:lsid:zoobank.org:act:1B74686B-BA11-4F5F-829F-28ECD9A13C1E.

*Holotype:* MZUSP 121652, male, 20.3 mm SL, BRAZIL, Amazonas State, Apuí, Igarapé Mutum, tributary of the Rio Juma, Rio Aripuanã drainage, Rio Madeira Basin, 7°14'58''S 59°58'40''W, 123 m a.s.l., 10 October 2016, O. Oyakawa, W. Ohara, M. Pastana and T. Teixeira (collectors).

*Paratypes:* BRAZIL, Amazonas State, Apuí. MZUSP 121651 (30, 15.9–23.4 mm SL; 3 C&S, 14.9–17.9 mm SL; 4 MOL, 16.7–19.5 mm SL); INPA 59405 (5, 16.6–17.5 mm SL); MNRJ 51748 (5, 16.1–19.1 mm SL), same data as the holotype. MZUSP 117653 (1, 16.2 mm SL), Rio Madeira Basin, Rio Aripuanã drainage, Rio Juma upstream from Paredão waterfall,

7°02'58''S 60°03'04''W, 23 June 2015, W. M. Ohara and V. Abrahão (collectors).

*Diagnosis:* *Poecilocharax rhizophilus* can be promptly distinguished from its congeners, except *P. weitzmani*, by having the anterior and posterior nares separated from each other by a distance equal to or greater than anterior nostril diameter (see Géry, 1965: fig. 11; vs. anterior and posterior nares separated only by a narrow skin fold); and by the absence of a nasal flap (vs. presence). The new species can be distinguished from *P. weitzmani* by the absence of a dark suborbital bar (vs. presence); absence of maxillary teeth (vs. presence); presence of a small unbranched ray preceding the two long unbranched anal-fin rays (vs. absence); presence of a dark humeral spot (vs. absence); absence of dark pigmentation on the median margin of the branchiostegal membrane in dimorphic males (vs. presence) and by its overall yellowish colour in life (vs. overall colour in life reddish).

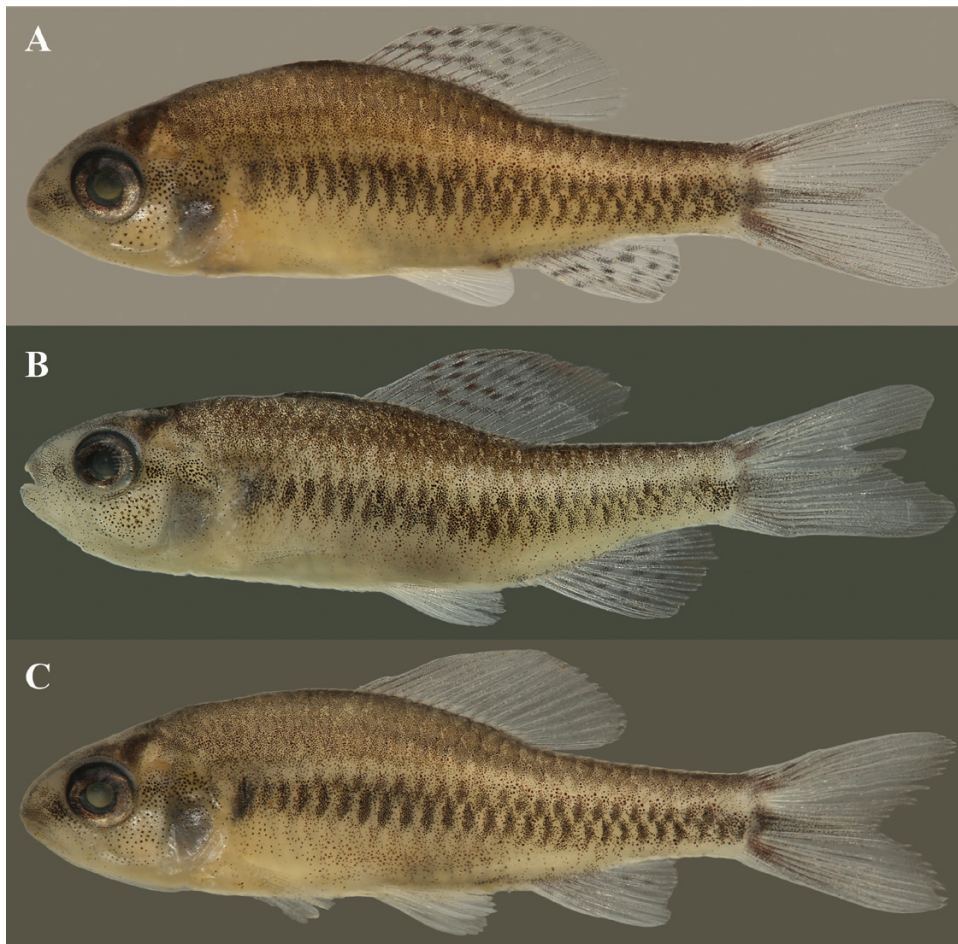

**Figure 12.** *Poecilocharax rhizophilus* sp. nov.: A, holotype, male, 20.3 mm SL, MZUSP 121652; B, paratype, male, 23.1 mm SL, MZUSP 121651; C, paratype, female, 23.3 mm SL, MZUSP 121651.

**Description:** Morphometric data presented in Table 3. Miniature species, largest specimen analysed reaching 23.3 mm SL (Fig. 12). Body moderately compressed and elongated. Greatest body depth approximately at vertical through tip of pectoral fin. Dorsal profile convex between tip of snout and base of last dorsal-fin ray; straight or slightly concave between that point to origin of anteriormost dorsal procurrent caudal-fin ray. Ventral profile of head convex; ventral profile of the body straight or slightly convex from posterior portion of the head to anal-fin origin; slightly convex along anal-fin base; straight or slightly concave between terminus of anal fin to origin of anteriormost ventral procurrent caudal-fin ray. Body elliptical in cross-section at pectoral-fin origin, broader ventrally, gradually becoming more compressed toward caudal-fin base.

Mouth small, terminal, jaws vertically aligned anteriorly. Snout shorter than eye diameter, gently rounded. Maxilla short, reaching level of anterior margin of orbit. Orbital margin free. Cheek narrow, less than half of eye diameter. Anterior and posterior nares conspicuously separated from each other; lacking a skin flap. Anterior naris circular, posterior naris crescent-shaped. Dorsal profile of head concave, concavity extending anteriorly from mesethmoid to midlength of frontal bones portion, allocating a frontal organ. Each frontal containing one relatively large foramen for passage of the trigeminal branch ophthalmicus superficialis that innervates the organ. Supraorbital absent. Antorbital positioned dorso-anteriorly to infraorbital 1; infraorbitals 2, 3 and 4 present (3); infraorbitals 5 and 6 absent (3). Pseudotympanum present, underneath third to fifth scales of longitudinal line.

Dentary in one row with 11–13 (3) conical to tricuspid teeth. Premaxillary teeth in a single row with ten to 11 (3) conical to tricuspid teeth. Premaxillary and dentary teeth increasing in size toward symphysis. Maxillary teeth absent (Fig. 13). Ectopterygoid with minute teeth. Branchiostegals five (2); four attached to anterior ceratohyal and one to posterior ceratohyal. First arch with two gill rakers on hypobranchial (3), six on ceratobranchial (3), one on cartilage between ceratobranchial and epibranchial (3) and five (2) or six (1) on epibranchial. Supraneurals four (3), cartilaginous.

Laterosensory system developmentally truncated, tubules opening in individual pores (i.e. never forming subpores). Supraorbital canal present, posteriorly truncated, associated with the nasal and frontal bones only. Parietal branch of supraorbital canal absent. Preopercular canal present, restricted to the horizontal axis of the pre-opercular bone. Infraorbital, mandibular, otic, postotic, supratemporal canals absent.

**Table 3.** Morphometric data for holotype and paratypes (range) of *Poecilocharax rhizophilus* sp. nov. ( $N = 30$ )  
SD = standard deviation

| Characters                           | Holotype | Range     | Median<br>± SD |
|--------------------------------------|----------|-----------|----------------|
| Total length (mm)                    | 26.0     | 20.6–29.6 | 22.1           |
| Standard length (mm)                 | 20.3     | 16.0–23.3 | 17.4 ± 1.8     |
| <b>Percentage of standard length</b> |          |           |                |
| Head length                          | 30.6     | 27.8–31.9 | 30.3 ± 1.1     |
| Prepectoral distance                 | 30.9     | 30.1–33.7 | 32.0 ± 1.0     |
| Pectoral-fin height                  | 15.0     | 12.5–16.1 | 14.2 ± 1.0     |
| Predorsal distance                   | 48.8     | 47.2–51.4 | 49.2 ± 1.1     |
| Dorsal-fin height                    | 19.5     | 19.0–24.0 | 21.9 ± 1.6     |
| Dorsal-fin base                      | 24.0     | 21.1–25.7 | 23.5 ± 1.1     |
| Prepelvic distance                   | 49.1     | 49.0–53.1 | 50.6 ± 1.1     |
| Pelvic-fin height                    | 18.3     | 15.0–19.3 | 17.9 ± 1.0     |
| Pre-anal distance                    | 68.0     | 68.0–73.6 | 70.3 ± 1.3     |
| Anal–apex distance                   | 88.8     | 86.1–92.6 | 88.8 ± 1.5     |
| Anus to anal-fin distance            | 1.9      | 1.4–2.7   | 2.1 ± 0.3      |
| Anal fin height                      | 19.9     | 16.4–21.1 | 18.2 ± 1.1     |
| Anal fin base                        | 12.7     | 10.8–13.8 | 12.6 ± 0.9     |
| Peduncle length                      | 20.2     | 17.4–21.9 | 19.3 ± 1.2     |
| Body depth at dorsal-fin origin      | 27.2     | 23.5–28.4 | 26.6 ± 1.1     |
| Body depth at anal-fin origin        | 19.9     | 16.0–20.1 | 18.0 ± 1.0     |
| Body depth at caudal peduncle        | 12.6     | 9.4–12.6  | 11.6 ± 0.7     |
| Body width                           | 9.8      | 7.8–11.1  | 9.5 ± 0.8      |
| <b>Percentage of head length</b>     |          |           |                |
| Snout length                         | 17.6     | 15.8–21.1 | 17.9 ± 1.2     |
| Maxilla length                       | 33.4     | 29.2–34.1 | 32.3 ± 1.4     |
| Anterior naris-orbit                 | 12.3     | 12.3–16.7 | 13.8 ± 1.6     |
| Posterior naris-orbit                | 15.8     | 11.8–16.7 | 14.4 ± 1.5     |
| Cheek                                | 13.2     | 10.9–15.8 | 13.3 ± 1.2     |
| Orbital diameter                     | 37.8     | 37.0–42.1 | 39.5 ± 1.3     |
| Interorbital diameter                | 30.5     | 27.9–32.5 | 31.2 ± 1.3     |

Scales cycloid; circuli distributed over entire area of scale. Two to five parallel and well-defined radii present on posterior portion of scale. Trunk lateral-line poorly developed, short, visible along first five to seven scales from longitudinal row. No visible pores on scales (except in two specimens, with pores on fifth and seventh scales, respectively). Longitudinal series with 28 (7), 29\* (8), 30 (10) or 31 (2) scales. Horizontal scale rows from dorsal-fin origin to lateral line four\* (29). Horizontal scale rows from pelvic-fin origin to lateral line four\* (26). Scales around caudal peduncle ten (1), 11(3), 12\* (21) or 13 (1). Predorsal scales series seven (1), eight\* (8), nine (12), ten (4) or 12 (1), covered by skin. Isthmus with scales reaching anteroventral margin of

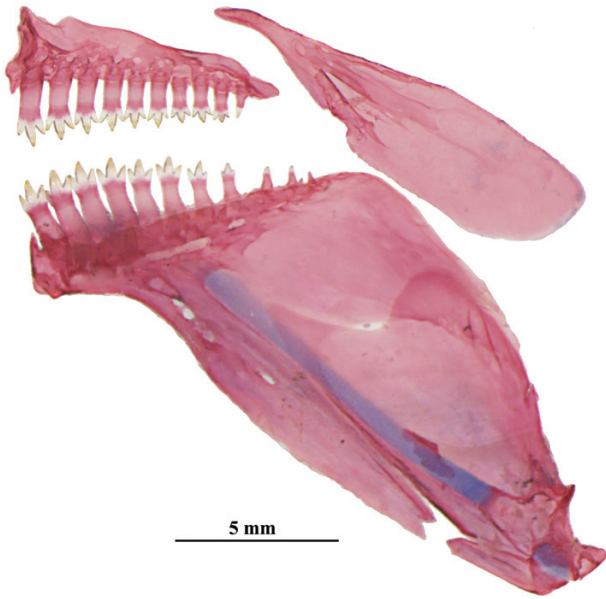

**Figure 13.** *Poecilocharax rhizophilus* sp. nov., medial view of premaxilla, maxilla and dentary, right side, MZUSP 121651, paratype, 16.5 mm SL.

cleithrum anteriorly. Scales between anus and anal fin none (6) or one\* (24). Anterior portions of scales with vertically oriented superficial neuromasts. Neuromast rows arched anteriorly and more conspicuous on anterior half of body.

Pectoral-fin rays i, ten (2) or 11 (1). Tip of longest pectoral-fin rays anterior to pelvic-fin origin and nearly at vertical through dorsal-fin origin. Pelvic-fin rays i, six, i\* (30). Tip of longest pelvic-fin rays slightly anterior to anal-fin origin, close to vertical through last ray of dorsal-fin base. Dorsal-fin rays iii, 12, i (3), iii, 13, i\* (25) or iii, 14, i (2); in the three C&S specimens there is a fourth additional anteriormost unbranched ray below the skin, not visible in alcohol-preserved specimens. Distal margin of dorsal fin straight to rounded. Dorsal-fin origin slightly anterior to vertical through pelvic-fin origin. First dorsal-fin pterygiophore located behind neural spine of eighth (1) or ninth (2) vertebrae. Externally visible anal-fin rays ii, six (12) or ii, seven\* (18) with distal margin straight to rounded; in three C&S specimens there is a third, small anteriormost unbranched anal-fin ray below skin, not visible in alcohol-preserved specimens. Anal-fin origin slightly posterior to vertical through last dorsal-fin ray. Scales covering base of anteriormost anal-fin rays none (5), one\* (22) or two (3). First dorsal anal-fin pterygiophore located behind neural spine of 18<sup>th</sup> (2) or 19<sup>th</sup> (1) vertebrae. Principal caudal-fin rays i, 9, 8, i\* (2). Caudal fin naked. Five (1) or six (2) dorsal procurrent caudal-fin rays and five (3) ventral procurrent caudal-fin

rays. Adipose fin absent. Hypurals one and two fused to each other; hypurals three to six autogenous. Total vertebrae 31 (3); precaudal vertebrae 18 (2) or 19 (1), caudal vertebrae 12 (1) or 13 (2).

*Colour in alcohol:* Overall background coloration of head and body beige, darker dorsally, with chromatophores densely distributed along two or three dorsalmost series of scales (Fig. 12). Small, dark chromatophores densely concentrated on premaxilla, tip of dentary and maxilla. Head with a dark diffuse stripe extending from tip of snout to dorsal half of opercle, crossing eyes. Ventral portion of head and gular region with silvery tinge and few, scattered, dark chromatophores. Eyes predominantly dark with scattered pigmentation on ventral portion. Suborbital stripe absent. Guanine on ventral portion of opercle, pre-opercle, subopercle and interopercle. Body with one dark, irregularly shaped blotch present immediately posterior to opercle, continuous with a dark midlateral stripe, which extends to tip of median caudal-fin rays. Midlateral stripe encompasses two series of scales vertically, overlapping with dark blotch on its anterior portion and extending to tip of middle caudal-fin rays.

Dorsal-fin coloration sexually dimorphic (Fig. 12). Adult males having dark chromatophores on rays and interradiation membranes; chromatophores roughly forming two to five descending dark stripes. Stripes restricted to anterior two-thirds of the dorsal fin, encompassing the first ten to 12 dorsal-fin rays. Remaining dorsal-fin area hyaline. Females and immature specimens of both sexes with dorsal fin mostly hyaline, except for few, dark, scattered chromatophores restricted to anterior edge of fin. Pectoral and pelvic fins predominantly hyaline, with few, scattered chromatophores present along margins of rays. Anal-fin coloration sexually dimorphic. Adult males having three to four ascending, dark, irregular stripes on anal fin formed by chromatophores along rays and interradiation membranes. Stripes present on first eight to nine anal-fin rays. Remaining anal-fin area hyaline. Anal fin of females and immature specimens of both sexes with chromatophores restricted to margin of rays and interradiation membrane, lacking stripes. Caudal fin mostly hyaline, except of middle caudal-fin rays; dorsal and ventral edge with chromatophores along rays and interradiation membranes. Upper and lower caudal-fin base with concentration of brown pigmentation.

*Colour in life:* Overall body coloration yellowish, darker dorsally (Fig. 14). Abdominal region yellow to silvery. Humeral spot and midlateral stripe usually visible in live specimens. Males and females similar in life coloration. Head yellow dorsally, silver



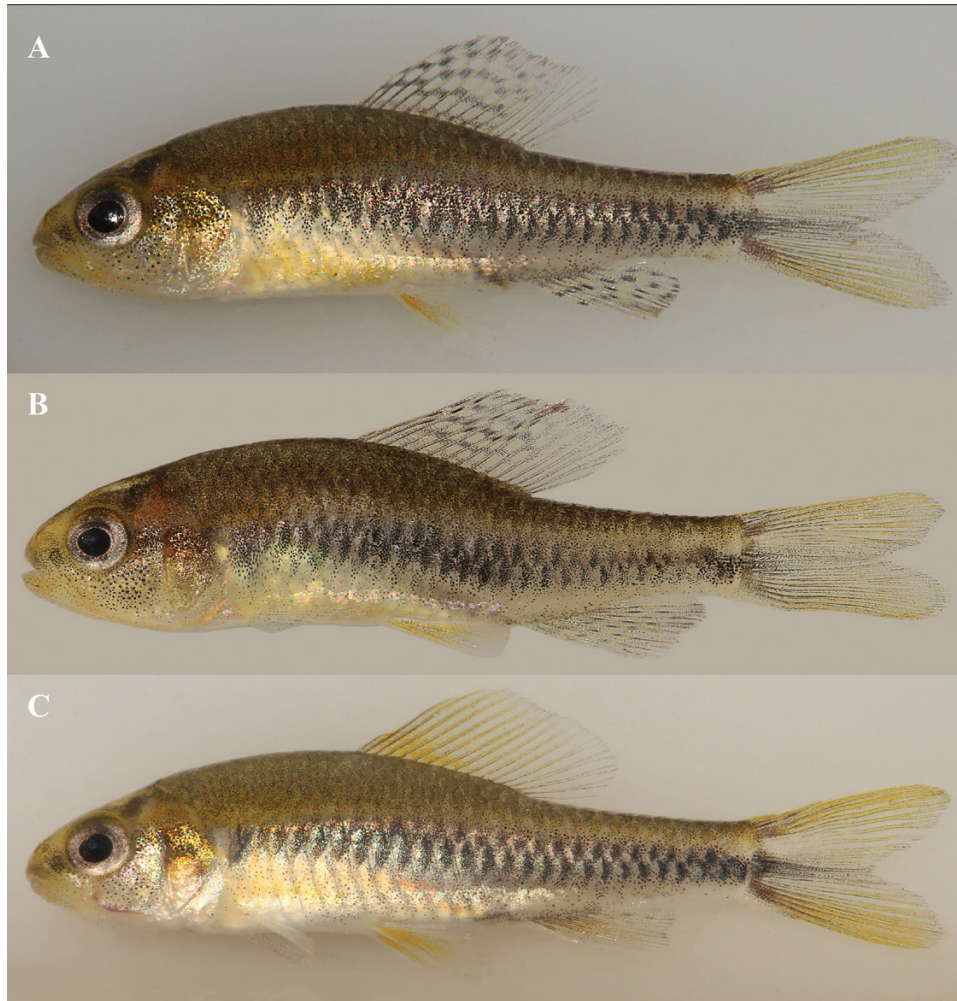

**Figure 14.** *Poecilocharax rhizophilus* sp. nov., immediately after capture. A, holotype, male, 20.3 mm SL, MZUSP 121652. Paratypes: B, male, 23.1 mm SL; C, female, 23.3 mm SL, MZUSP 121651.

ventrally. Guanine deposits on infraorbitals 2 and 3, cheeks, ventral portion opercular bone, along sub- and interopercle. Upper half of opercle golden. Dentary, premaxillary, and maxillary yellowish.

Dorsal-fin coloration sexually dimorphic. Adult males lacking yellow pigment on the base of the fin and with dark pigments arranged in descending stripes (see ‘Colour in alcohol’). Females and immature specimens of both sexes with proximal portion of interradiation membranes yellow from first 11–14 anteriormost dorsal-fin rays and lacking dark pigmentation. Pectoral fin predominantly hyaline and pelvic fin yellowish in both sexes. Yellow pigmentation more concentrated on base of fin rays. Anal-fin coloration sexually dimorphic; adult females with more conspicuous yellow coloration, and adult males with dark blotches forming irregular ascending dark stripes. Pigmentation on females and juveniles of both sexes stronger on base of first five

branched anal-fin rays. Caudal fin mostly yellowish, except from middlemost caudal fin rays, with black pigmentation following from dark midlateral stripe.

*Sexual dimorphism:* Dorsal fin of adult males with two to five conspicuous dark descending stripes, restricted to anterior two-thirds of the fin; anal fin with three or four ascending dark stripes on rays, present along the first eight or nine anal-fin rays (Fig. 14A). Females and immature specimens of both sexes with dorsal and anal fins mostly hyaline (Fig. 14B). Further details of dimorphic coloration in ‘Colour in alcohol’ section. Bony hooks were not observed on fins of either sex.

*Etymology:* The specific name *rhizophilus* is Latinized from the Greek words ρίζα [rhiza], root, and φίλος [philos], friend. The name refers to habitat where the

species was collected, in between subaquatic roots of riparian vegetation. It is a declinable adjective.

**Geographic distribution:** *Poecilocharax rhizophilus* is known from two localities, both upstream from Paredão Falls, in the Rio Juma, middle Rio Aripuanã drainage, Rio Madeira Basin, Apuí Municipality, Amazonas State, Brazil (Fig. 10).

**Ecological notes:** *Poecilocharax rhizophilus* occurs in black (Rio Juma) and clear water (Igarapé Mutum). The type locality is a tributary of the Rio Juma (Igarapé Mutum), that runs through impacted pasture area, at an elevation of 123 m, with swift current, 2–4 m wide, 1–2 m deep and a substrate composed mainly of mud and sand. One specimen was captured in the Rio Juma, which is a black-water river. Different micro-environments were exhaustively sampled during

collecting activities, but *P. rhizophilus* was only captured in the medium-upper water column between subaquatic roots of riparian vegetation (Fig. 15). Other species sampled syntopically with *P. rhizophilus* were *Acestrorhynchus falcatus* (Bloch, 1794), *Bario steindachneri* (Eigenmann, 1893), *Characidium* sp., *Corydoras gracilis* Nijssen & Isbrücker, 1976, *Gymnotus coropinae* Hoedeman, 1962, *Hemigrammus ocellifer* (Steindachner, 1882), *Hoplias malabaricus* (Bloch, 1794), *Hyphessobrycon platyodus* Ohara, Abrahão & Espíndola, 2017, *H. procyon* Pastana & Ohara, 2016, *Moenkhausia comma* Eigenmann, 1908, *Otocinclus mura* Schaefer, 1997, *Satanoperca jurupari* (Heckel, 1840) and *Tatia dunni* (Fowler, 1945). The analysis of the stomach contents of three paratypes of *P. rhizophilus* revealed the presence of Cladocera (Chydoridae), Chironomidae, unidentified insect fragments and inorganic sediments.

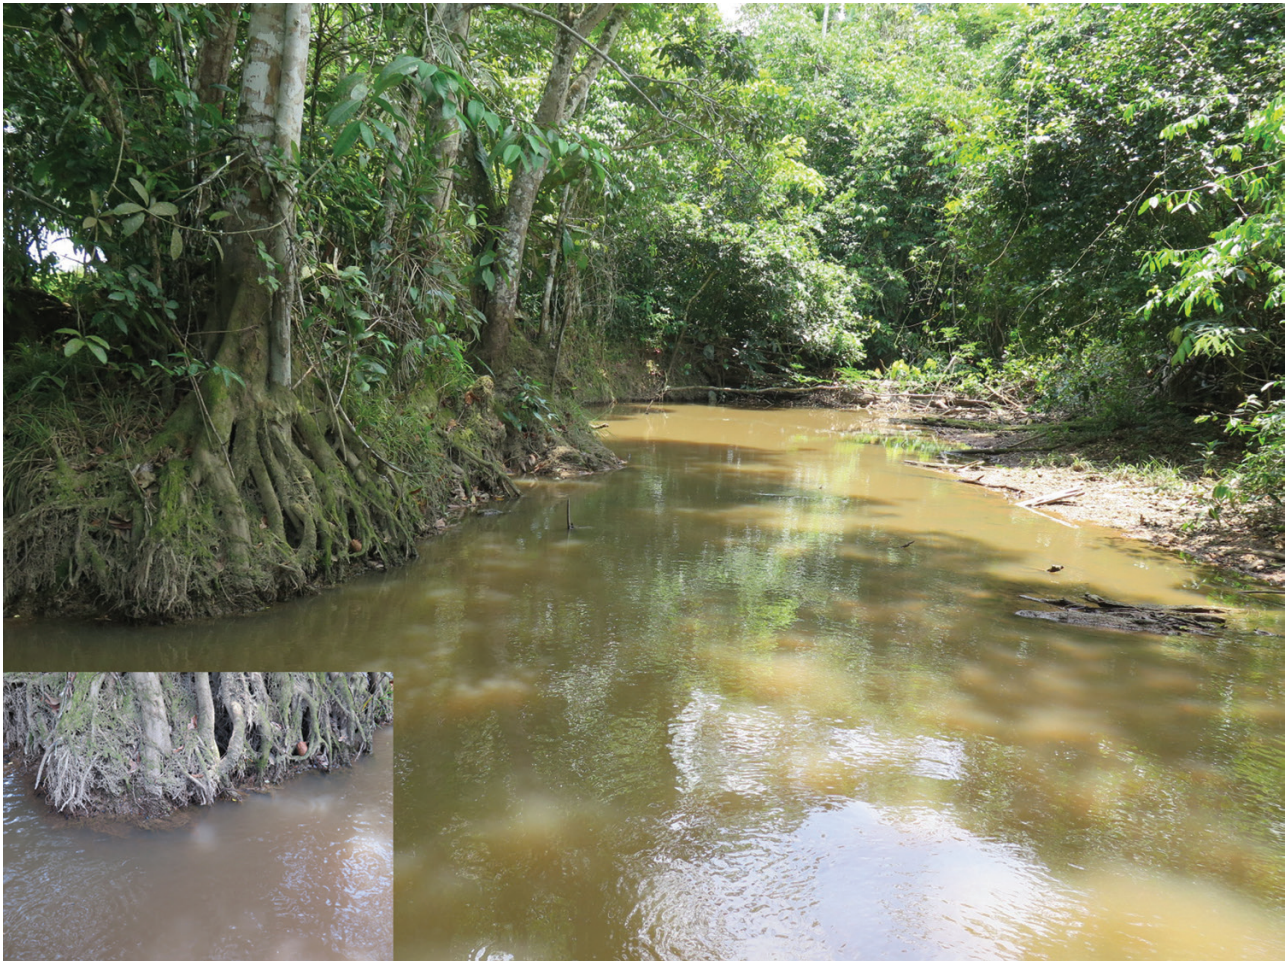

**Figure 15.** Igarapé Mutum, tributary of Rio Juma, Rio Aripuanã Basin, Apuí, Amazonas, Brazil, type-locality of *Poecilocharax rhizophilus* sp. nov. Inset details the microenvironment where *P. rhizophilus* sp. nov. was captured.

## KEY TO THE SPECIES OF CRENUCHINAE

- 1a. Asymmetrical dark spot on caudal peduncle present; dark midlateral stripe on flanks absent.....2  
 1b. Asymmetrical dark spot on caudal peduncle absent; dark midlateral stripe on flanks present (sometimes diffuse).....3  
 2a. Adipose fin present; dark blotches on flank absent; posterior terminus of maxilla surpassing vertical through anterior margin of orbit.....*Crenuchus spilurus*  
 2b. Adipose fin absent; dark blotches on flank present; posterior terminus of maxilla never surpassing vertical through anterior margin of the orbit.....*Poecilocharax callipterus*  
 3a. Two dark, longitudinal stripes positioned dorsally and ventrally along the head and body; anterior and posterior nasal openings separated by a narrow skin fold; presence of nasal flap between anterior and posterior nares.....*Poecilocharax bovaliorum*  
 3b. One dark, longitudinal stripe positioned on middle of flank; anterior and posterior nasal openings widely separated from each other; absence of a nasal flap.....4  
 4a. Suborbital bar present; humeral blotch absent; dimorphic males with dark pigmentation on medial margin of branchiostegal membrane.....*Poecilocharax weitzmani*  
 4b. Suborbital bar absent; humeral blotch present; dimorphic males lacking dark pigmentation on medial margin of branchiostegal membrane.....*Poecilocharax rhizophilus*

**Conservation assessment:** The extinction risk for this species is preliminarily assessed as high. *Poecilocharax rhizophilus* is a species of restricted geographical range, with an Extent of Occurrence (EOO) of 50 km<sup>2</sup> and known from two localities (Fig. 10). The type locality has moderate riparian forest surrounded by pasture, and the other site is a touristic area (Paredão Falls), intensely impacted by agriculture. There are three Conservation Units surrounding the type locality (Floresta Nacional do Jatuarana to the south, Parque Nacional do Acari to the east and Floresta Nacional do Aripuanã to the west) and there are some preserved, but unprotected areas nearby the type locality. However, the new species was not found elsewhere other than the type locality, despite intense collecting efforts, and it is uncertain if *P. rhizophilus* is present in these Conservation Units or in other areas. Sampling activities took place in 2015 and 2016, and at that time, the two localities where the species was found (i.e. the Igarapé Mutum and Rio Juma) did not present signs of silting, water turbidity and erosion on the banks (Fig. 15). However, the territory of Apuí has been heavily impacted by deforestation since the discovery of the new species, and it is currently ranked in second place in a list of Brazilian municipalities with greatest loss of native forest (Fonseca et al., 2021). A continuous decline in the habitat quality is expected and inferred based on erosion, silting and increased turbidity, as results of continued deforestation in the region. There are no estimates of population size or population decline. For these reasons, *P. rhizophilus* is tentatively assessed Near Threatened (NT) by criterion B2ab(iii) according to the International Union for Conservation of Nature

(IUCN) categories and criteria (IUCN Standards and Petitions Sub-Committee, 2019).

## DISCUSSION

## GENETIC STRUCTURE AND MONOPHYLY OF CRENUCHINAE BASED ON MOLECULAR AND MORPHOLOGICAL DATA

Currently, molecular analyses are used as an additional methodology to help with species delimitation in Neotropical fishes and to support new species descriptions (e.g. Barreto et al., 2018; Ota et al., 2020). In this study, the results of genetic analysis (DNA barcodes and species delimitation method ABGD) confirmed *Poecilocharax callipterus* and *P. rhizophilus* as distinct taxa in Crenuchinae, which have been formally described as species herein based on morphological characters. The values of genetic divergence between the analysed species were high, indicating genetic structuring. Several authors have suggested that inferences regarding species boundaries, based on genetic data alone, are probably inadequate, and that species delimitation should be conducted with consideration of other factors, such as morphology, geographical distribution and behaviour (Carstens et al., 2013; Camelier et al., 2018), as is done in this study. Because some studies involving different orders, families and genera of fishes have indicated that high intraspecific values (as found in both *Crenuchus spilurus* and *Poecilocharax weitzmani*) could signal cryptic species and/or possible new species within the analysed group (e.g. Ward et al., 2009; April et al., 2011; Pereira et al., 2013), this variation plus the ABGD results should be

investigated in more detail in future studies, but it is not within the scope of our study.

The monophyly of Crenuchinae has never been contested on the grounds of cladistic analyses. Previous molecular phylogenetic studies have indicated a robust sister-group relationship between *Crenuchus spilurus* and *Poecilocharax weitzmani* (Oliveira *et al.*, 2011: fig. 6), a clade that is recovered as sister-group to Characidiinae. Accordingly, our phylogenetic analysis indicated a monophyletic Crenuchinae that is strongly supported by *COI* sequences (Fig. 1). The results obtained herein are the same as obtained by Oliveira *et al.* (2011) in retrieving *Crenuchus* and *Poecilocharax* as sister-lineages, a topology that remains stable even after expanding the analysis to encompass all five representatives of this subfamily (i.e. two genera and five species, including the two described herein).

Morphological studies, on the other hand, have never tested the monophyly of Crenuchinae, including all species and using a cladistic framework. Currently, the synapomorphies listed for the subfamily follows Buckup (1998), a study that provided a list of 12 morphological characters to support the monophyly of Crenuchinae. The analysis included only one representative of the subfamily (*Crenuchus spilurus*; Buckup, 1998: table 1). *Poecilocharax weitzmani* and *P. bovaliorum* were not included as terminals in Buckup's cladistic analysis, although they were analysed as comparative material and confirmed for the synapomorphies retrieved for Crenuchinae.

From the 12 synapomorphies listed for the monophyly of Crenuchinae, three (Buckup, 1998: 136, chars 1–3) are related to modifications involving the frontal organ (Fig. 4): (1) the enlargement of the frontal foramina; (2) the presence of the frontal organ; and (3) the depression of the frontal bone that serves to allocate the frontal organ and that contains the frontal foramina. Our examination confirms the existence of a frontal organ and the modification of the frontal bones in all species of Crenuchinae, and thus corroborates it as a synapomorphy for the subfamily. Little has been published concerning the morphology and function of the frontal organ, and the available descriptions of this structure dates back to Alexander (1963), Géry (1963) and Bossy *et al.* (1965). According to these authors, the frontal organ runs across the paired frontal foramina and provides a direct contact between the central nervous system (via ophthalmic branching from the trigeminal nerve and a dedicated ophthalmic ganglion) and the superficial epithelium. Although probably a sense organ (Alexander, 1963), the frontal organ is not related to the cephalic laterosensory system (Bossy *et al.*, 1965). The similarities between the frontal organ and the cephalic lateral-lines are too distant, both anatomically and structurally, to trace a relation between both systems (Bossy *et al.*, 1965).

Buckup (1998: 136, chars 4–12) provided nine additional synapomorphies for Crenuchinae: (4) lateral ethmoidal wing well developed; (5) lack of connection between supraorbital and otic canals; (6) absence of supraorbital bones; (7) presence of mesopterygoid (= endopterygoid) teeth; (8) dentary bones with hinge-like joint; (9) lamellar portion of large supraneural without contact with neural spine; (10) coracoid small; (11) fusion of postcleithra 1 and 2; and (12) fusion of hypurals 1 and 2. Although these characters are not exclusive to Crenuchinae, they were considered phylogenetically informative due to their absence in Characidiinae (the immediate outgroup of Crenuchinae) and the restricted occurrence in Characiformes. Our detailed morphological analysis of *Crenuchus spilurus* and the four species of *Poecilocharax* corroborates the occurrence of all nine character-states in members of the subfamily. Complementary to Buckup's (1998) list of synapomorphies, we provide five morphological characteristics with restricted occurrence in Crenuchidae and Characiformes that further strengthens the monophyly of Crenuchinae. Phylogenetic interpretations offered below are based on maximum parsimony optimizations of non-ambiguous characters on to Buckup's (1993b, 1998) trees. They are provisionally listed as putative synapomorphies awaiting a formal cladistic study of the subfamily Crenuchinae to confirm their synapomorphic status.

#### INFRAORBITAL CANALS TRUNCATED

All Crenuchinae examined herein have some degree of truncation in the infraorbital canal of the cephalic lateral-line system. In Characiformes, the infraorbital canal is usually disposed along the inner portion of the infraorbital bones 1 to 6, where it contacts the supraorbital and otic canals posterodorsally (Pastana *et al.*, 2019). Within Crenuchidae, the integrity of the infraorbital canal is retained only in Characidiinae. Although these fishes lack true infraorbital bones (Buckup, 1993a; Pastana *et al.*, 2019), the infraorbital canal is still continuous along the ventral margin of the orbit, and its posterodorsal end anastomoses with both the supraorbital and otic canals (Pastana *et al.*, 2019: figs 4, 9). Representatives of Crenuchinae instead have a modification of this general pattern: in *Crenuchus spilurus*, *Poecilocharax bovaliorum* and *P. callipterus*, the infraorbital canal is absent along infraorbital plates 3 to 5, and in the two other species of *Poecilocharax* (i.e. *P. rhizophilus* and *P. weitzmani*), the entire infraorbital canal is missing.

Truncation of the infraorbital canal is common among Characiformes, although rarely used as phylogenetic information. Similar truncation of the infraorbital canal is observed in Gasteropelecidae (Pastana *et al.*,

2019), some small-sized lebiasinids (e.g. *Pyrrhulina* Valenciennes, 1846 and *Nannostomus* Günther, 1872) (Weitzman, 1964), alestids (e.g. *Ladigesia* Géry, 1968 and *Lepidarchus* Roberts, 1966) (Zanata & Vari, 2005), distichodontids (e.g. some species of *Neolebias* Steindachner, 1894) (Vari, 1979) and several characids (e.g. species of *Paracheirodon* Géry, 1960, *Erythrocharax altipinnis* Netto-Ferreira et al., 2013a and *Hyphessobrycon myrmex* Pastana et al., 2017) (Weitzman & Fink, 1983; Netto-Ferreira et al., 2013a; Pastana et al., 2017). According to Pastana et al. (2019), losses of lateral-line canal segments result from developmental truncation events, whereas canal segments associated with infraorbital bones 3 to 5 are among the first to be lost. Losses restricted to portions of the infraorbital canals (as occurs in *Crenuchus spilurus*, *Poecilocharax bovaliorum* and *P. callipterus*) are likely to be a result of truncations on the last steps of the development of the lateral-line system. Truncations present on *P. rhizophilus* and *P. weitzmani* are instead much more severe and probably occur in earlier steps of the lateral-line ontogeny (Pastana et al., 2019). Either way, all crenuchin species have some level of lateral-line truncation affecting the infraorbital canal.

Given the widespread occurrence of a complete infraorbital canal in Characidiinae, as well as in most Characiformes, the infraorbital-canal truncation of Crenuchinae (affecting segments associated with infraorbital plates 3 to 5 in *Crenuchus spilurus*, *Poecilocharax callipterus* and *P. bovaliorum*; and the entire infraorbital canal in *P. rhizophilus* and *P. weitzmani*) is herein listed as an additional synapomorphy for the subfamily.

#### TRUNK LATERAL-LINE CANAL TRUNCATED

All Crenuchinae have the trunk lateral-line truncated posteriorly. In these fishes, the trunk canal is either restricted to the anterior half of the body associated with few longitudinal scales or entirely absent. In *Crenuchus spilurus*, the longitudinal series of scales is pored from the first five to eight scales. Among species of *Poecilocharax*, the number of pored scales varies from none (*P. weitzmani* and *P. rhizophilus*) up to five or six (*P. bovaliorum* and *P. callipterus*, respectively).

In Characidiinae, the immediate outgroup of Crenuchinae, lateral-line truncation occurs in several taxa, i.e. *Characidium*, *Elachocharax*, *Microcharacidium*, *Odontocharacidium* and *Skiotharax* (e.g. Weitzman & Kanazawa, 1977; Weitzman, 1986; Buckup, 1993c; Zarske, 1997; Netto-Ferreira et al., 2013b; Mendonça & Netto-Ferreira, 2015; Rodrigues & Netto-Ferreira, 2020), although these events are often concentrated in phylogenetically restricted clades (Buckup, 1993b: char. 44, clade 6, C4; Netto-Ferreira et al., 2013b; Mendonça &

Netto-Ferreira, 2015). Character optimization shows that a complete trunk lateral-line is the plesiomorphic condition among the subfamily Characidiinae (Buckup, 1993a). Similarly, a complete trunk lateral-line is widespread among Characiformes (Pastana et al., 2019), including the characoid families possibly closely related to Crenuchidae (Buckup, 1998). Therefore, the truncated lateral-line present in Crenuchinae is most parsimoniously interpreted as an apomorphic condition present in the subfamily and is listed herein as an additional putative synapomorphy for this group of fishes.

Interestingly, all examined crenuchin species share another modification of their laterosensory system, i.e. an abundance of superficial neuromasts distributed along the dorsal and lateral portions of the head, and on the proximal portion of the scales (Fig. 8). The superficial neuromasts (hereafter treated as SNs) of crenuchins are similar in size, orientation and position to SNs reported for other ostariophysans (e.g. Schmitz et al., 2008: 753, fig. 1A; Beckmann et al., 2010: 275, fig. 1H; Menezes & Lucena, 2014: 196, figs 1, 2). Abundance of SNs are found in fish species that inhabit calm water habitats and that usually have a sedentary life-style (e.g. Dijkgraaf, 1963; Merrilees & Crossman, 1973a, b; Vischer, 1990), although some exceptions have been documented (i.e. Beckmann et al., 2010; Schmitz et al., 2014). In contrast, species that prefer running waters often have well-developed lateral-line canals and relatively fewer SNs (e.g. Engelmann et al., 2002, 2003; Bassett et al., 2006). Both the habitat and life style described for species with abundant SNs match our observations for the species of *Poecilocharax* described herein and the remaining of the crenuchin species, which all inhabit calm water and have a sedentary life-style.

Truncation of lateral-line canals has been documented to occur together with proliferation of superficial neuromasts (Poulson, 1963; Rizzato & Bichuette, 2016), and this process appears to be correlated with life in still waters or confined spaces. Since crenuchins display both a truncated lateral-line and densely distributed SNs along the dorsal and dorsolateral portions of the head and body, we opt for a cautious interpretation and treat both variables provisionally as co-dependent of each other. We thus list the lateral-line truncation as an additional putative synapomorphy for the Crenuchinae, interpreting the SN distribution as a possible morphological adaptation that is correlated to the trunk canal truncation.

#### DORSAL-FIN RAYS NUMEROUS

Species of Crenuchinae have a high number of dorsal-fin rays when compared to other Characiformes. Both *Crenuchus* and *Poecilocharax* have three or four

unbranched dorsal-fin rays, which are followed by 13 to 17 branched rays in the former, or 11 to 14 branched rays in the latter, thus ranging from 14 to 21 total elements.

Among the crenuchin subfamily Characidiinae, the dorsal-fin ray number varies from 11 to 14 (including both branched and unbranched rays), a count considered plesiomorphic for the subfamily and among Characiformes (Géry, 1971; Weitzman & Géry, 1981; Buckup, 1993b). Exceptions are found only among members of *Elachocharax* that may exhibit up to 22 dorsal-fin rays, including both branched and unbranched elements (Géry, 1965, 1971; Weitzman & Géry, 1981; Buckup, 1993c), a feature considered derived for the genus (Weitzman & Géry, 1981: fig. 7, char. 1). In Characiformes in general, the number of dorsal fin rays ranges from 11 to 14 elements (in total) and a high dorsal-fin ray count that matches those observed among Crenuchinae is known only in citharinids (e.g. *Citharinus* Cuvier, 1817: 20–23 elements), distichodontids (e.g. *Xenocharax* Günther, 1867: 19–24 elements) and serrasalmids (16–32 elements; Machado-Allison, 1983: 158, char. 2).

Current relationship hypotheses of Characiformes do not corroborate a sister-group relationship of Crenuchidae with Citharinoidei or Serrasalmidae, and the monophyly of both Citharinoidei (positioning Citharinidae as sister-group of Distichodontidae, *sensu* Vari, 1979; Buckup, 1998) and Serrasalmidae (*sensu* Machado-Allison, 1983) has remained unquestioned. Therefore, the elevated number of dorsal-fin rays seems to be an independently derived feature of Crenuchinae and is listed herein as an additional putative synapomorphy for the subfamily.

#### PRESENCE OF SEXUAL DICHROMATISM

All species of Crenuchinae have sexual dichromatism in some degree. Documentation of this dichromatism is available for *Poecilocharax weitzmani* (Beltrão *et al.*, 2018), *P. bovaliorum* (Pastana *et al.*, 2017) and for *Crenuchus spilurus* (Borghezán *et al.*, 2019), all of which have males with more intense coloration in their dorsal and anal fins than females (e.g. Borghezán *et al.*, 2019: fig. 1). In addition to these taxa, we expand the presence of sexual dichromatism to encompass both new species described herein, *Poecilocharax callipterus* and *P. rhizophilus*, based on observation of live and alcohol preserved specimens. In these, sexual dichromatism is expressed as differential presence of both black (melanophores) and red to orange (carotenoids) pigmentation. Adult males have an overall more intense coloration and a darker pigmentation on body and fins than females (Figs 9, 14).

Within Crenuchidae, dichromatic coloration can also be found in Characidiinae. However, the distribution

of this trait among Characidiinae is restricted to a small number of species when considering the richness of the subfamily, all belonging to the genus *Characidium* (e.g. Buckup, 1993b; Buckup & Hahn, 2000; Melo & Espíndola, 2016; Pastana *et al.*, 2017: supporting information; Teixeira & Melo, 2021). Within *Characidium*, sexual dichromatism is most parsimoniously interpreted as an apomorphic condition of a small group of species (Buckup, 1993b: clade C4) and possibly homoplastically present in several other taxa (Pastana *et al.*, 2017: supporting information; Teixeira & Melo, 2021). When optimized in Buckup's (1993b) tree, sexual dichromatism is retrieved as a synapomorphy for clade C4 and indicates that the lack of differential coloration among males and females is the plesiomorphic condition among Characidiinae.

Dichromatic coloration among sexes is of limited occurrence among Characiformes. Pastana *et al.* (2017) reviewed and summarized the occurrence of this type of sexual dimorphism in Characiformes, indicating that dichromatism occurs in 108 species of six characiform families: Alestidae, Characidae, Crenuchidae, Curimatidae, Lebiasinidae and Serrasalmidae. Available morphology-based phylogenies of Characiformes (i.e. Buckup, 1998) do not support a close relationship of Crenuchidae with any of these characiform families, thus indicating that the dichromatism is a derived feature of crenuchids. When optimized on to the phylogenies of Buckup (1993b, 1998), sexual dichromatism is homoplastically present in both subfamilies. Thus, we list it as a putative synapomorphy for Crenuchinae with independent occurrence in a subset of *Characidium* species (Characidiinae).

#### SEXUALLY DIMORPHIC ELONGATION OF THE SEVENTH TO 11<sup>TH</sup> DORSAL-FIN RAYS

Sexually dimorphic elongation of dorsal-fin rays in males is present in all known crenuchins with the exception of *Poecilocharax rhizophilus*. In some crenuchins, fin elongation is so pronounced that the elongated rays form a long dorsal-fin filament that can reach the upper caudal-fin lobe (e.g. *Poecilocharax callipterus*: Figs 3A, 9A). Sexually dimorphic males have a dorsal-fin elongation of the median dorsal-fin rays, more specifically from the seventh–eighth to the eighth–11<sup>th</sup> fin rays (except in *P. rhizophilus* that lacks dorsal-fin elongation).

Aside from crenuchins, fin elongation related to sexual dimorphism is herein reported to occur in only six of the 23 families currently recognized in Characiformes (i.e. Alestidae, Characidae, Erythrinidae, Hemiodontidae, Lebiasinidae and Serrasalmidae). However, a detailed literature review indicates that the pattern of dorsal-fin elongation present in Crenuchinae, i.e. seventh–eighth

to the eighth–11<sup>th</sup> dorsal-fin rays, contrasts from those observed in most other Characiformes. In sexually dimorphic Characidae, for example, the elongation usually affects the second unbranched dorsal-fin ray, as in *Odontostilbe* Cope, 1870 (Bührnheim & Malabarba, 2006, 2007) and *Serrapinnus* Malabarba, 1998 (Malabarba & Jerup, 2014); or the last unbranched and first three to five branched dorsal-fin rays, such as in *Carlana* Strand, 1928 (Cardoso, 2003), *Erythrocharax* (Netto-Ferreira *et al.*, 2013a), *Hemigrammus* spp. (e.g. Benine & Lopes, 2007; Zarske, 2011), *Hyphessobrycon* spp. (e.g. Moreira *et al.*, 2002; Ohara *et al.*, 2017a; Pastana & Ohara, 2016), *Moenkhausia* spp. (e.g. Eigenmann, 1920), *Nematocharax* Weitzman *et al.*, 1986 (Weitzman *et al.*, 1986; Menezes *et al.*, 2015; Barreto *et al.*, 2018), *Parastremma* Eigenmann, 1912 (cf. Dahl, 1960), *Rhoadsia* Fowler, 1911 (cf. Aguirre *et al.*, 2016) and *Trochilocharax* Zarske, 2010 (Zarske, 2010). Likewise, representatives of the Alestidae (i.e. *Alestopetersius* Hoedeman, 1951, *Bryconaethiops* Günther, 1873, *Bryconalestes* Hoedeman, 1951, *Nannopetersius* Hoedeman, 1956 and *Phenacogrammus* Eigenmann, 1907; Zanata & Vari, 2005) and Lebiasinidae (i.e. *Pyrhulina* spp. and *Copella* spp.; Zarske, 2011; Marinho & Menezes, 2017) have the dorsal-fin elongation affecting generally the anteriormost dorsal-fin rays. Fin elongation is also present in Serrasalminae (e.g. *Mylesinus* Valenciennes, 1850, *Myleus* Müller & Troschel, 1844, *Myloplus* Gill, 1896, *Ossubtus* Jégu, 1992 and *Tometes* Valenciennes, 1850; Andrade *et al.*, 2016a, 2017; Jégu *et al.*, 1989; Ohara *et al.*, 2017b) and Hemiodontidae [*Hemiodus atranalis* (Fowler, 1940); WMO, pers. obs.]. Yet, dorsal-fin filaments in Serrasalminae and Hemiodontidae are unique among Characiformes in not forming a single lobe or filament, but several filaments continuing from different elongated fin rays.

Among Characiformes, the only dorsal-fin elongation matching the condition described for Crenuchinae occurs in the erythrinid *Erythrinus erythrinus*. Dimorphic males of this species have the seventh to tenth dorsal-fin rays elongated, a morphology remarkably similar to that observed in crenuchins. However, given the restrict occurrence of this character-state within Erythrinidae (present only in *Erythrinus*), and the latest phylogenetic hypotheses rejecting a sister-group relationship between crenuchids and Erythrinidae (Oliveira *et al.*, 2011; Arcila *et al.*, 2017; Mirande, 2019), the dorsal-fin elongation present in Crenuchinae and *Erythrinus* is most parsimoniously interpreted as homoplastic. The crenuchin fin elongation is listed herein as an additional putative synapomorphy for the subfamily.

Further modification of the dorsal-fin elongation occurs in Crenuchinae. While in *Crenuchus spilurus*, *Poecilocharax bovaliorum* and *P. callipterus* the

dimorphism affects the seventh or eighth to the eighth or 12<sup>th</sup> rays, this condition is further modified in *P. weitzmani*. Dimorphic males of this species have an autapomorphic elongation of all dorsal-fin rays. *Poecilocharax rhizophilus*, on the other hand, is the sole crenuchin species that lacks dorsal-fin elongation, a morphology that is herein interpreted as a reversal to the plesiomorphic characiform condition.

#### COMMENTS ON THE DIAGNOSIS OF THE GENUS *POECILOCHARAX*

*Poecilocharax* has historically been distinguished from *Crenuchus* based on four morphological characters, namely the short maxilla (not surpassing the vertical through anterior margin of the orbit), absence of an adipose fin, presence of maxillary teeth and absence of an asymmetrical caudal-peduncle spot (Eigenmann, 1909, Géry, 1965; Buckup, 1998). Although the long maxilla is a character that still awaits a formal test based on phylogenetic grounds and encompassing a larger sample of characiform lineages as outgroup, within Crenuchidae this feature is only present in *Crenuchus*. Both Characidiinae and the crenuchin genus *Poecilocharax* exhibit a short maxillary bone that never surpasses the vertical through the anterior margin of the orbit. Thus, within Crenuchinae, a maxilla not surpassing the anterior orbital margin is a valid diagnostic character of *Poecilocharax*.

Although the adipose fin was initially reported as absent in the original description of *Crenuchus* (Günther, 1863: 443), this information was incorrect and later amended by Günther (1864: 365). No species of *Poecilocharax* has an adipose fin, while it is always present in *C. spilurus* and plesiomorphically present in Crenuchidae (Buckup, 1993b: char. 45). Among characidiins, adipose-fin loss is observed in *Elachocharax* (Weitzman, 1986), in some *Characidium* species (e.g. *C. sterbai*, *C. nana*, *C. nupelia*, *C. xavante*, *C. mirim* and *C. stigmatosum*) (Zarske, 1997; Melo & Buckup, 2002; Graça *et al.*, 2008, 2019; Netto-Ferreira *et al.*, 2013b; Mendonça & Netto-Ferreira, 2015) and variably in *Odontocharacidium* species (Weitzman & Kanazawa, 1977; Rodrigues & Netto-Ferreira, 2020). Phylogenetically, adipose-fin loss is apomorphic for the crenuchin clade E1 in Buckup's (1993b) analysis, while according to Mendonça & Netto-Ferreira (2015) this is synapomorphic for a *Characidium* clade containing *C. nupelia*, *C. xavante*, *C. mirim*, *C. stigmatosum*, *C. rachovii*, *C. occidentale*, *C. orientale* and *C. vestigipinne* (although the four latter species exhibit a reversal in this characteristic). Similarly, the absence of an adipose fin in *Poecilocharax* is probably a modification of the plesiomorphic condition present in Crenuchidae and could be interpreted as a putative synapomorphy diagnostic for the genus.

While the absence of an adipose fin and the presence of a short maxilla still stand as valid diagnostic features for *Poecilocharax*, the description of *Poecilocharax callipterus* and *P. rhizophilus* directly affects other diagnostic characteristics traditionally used to separate this genus from *Crenuchus* (i.e. maxillary teeth and asymmetrical caudal-peduncle spot). Maxillary teeth are indeed present in *P. bovaliorum* and *P. weitzmani* (Eigenmann, 1909; Géry, 1965), but are lacking in *P. callipterus* and *P. rhizophilus* (and in *C. spilurus*). Within characidiins, maxillary teeth are variously present in some lineages, i.e. *Ammocryptocharax*, *Odontocharacidium* and *Klausewitzia ritae* (Géry, 1965; Weitzman & Kanazawa, 1976; Buckup, 1993c; Rodrigues & Netto-Ferreira, 2020), but plesiomorphically absent in this subfamily (Buckup, 1993b). In addition, the peculiar caudal-peduncle spot of *Crenuchus spilurus*, often used to differentiate this species from other crenuchins (e.g. Buckup & Van der Sleen, 2017), is also present in *P. callipterus*. The spot is located on the ventral portion of the caudal peduncle (vs. on the middle portion of the peduncle in most Characiformes) and only present in these two species (Figs 3, 9).

In addition to the maxillary teeth and the asymmetrical caudal-peduncle spot, our study also yielded three additional characteristics with an unresolved optimization in crenuchins: (1) the fusion between fifth and sixth hypurals; (2) the number of branched pelvic-fin rays; and (3) the number of unbranched anal-fin rays. Crenuchins are characterized by having hypural plates 1 and 2 fused to each other (Buckup, 1998). Among species of *Poecilocharax*, further hypural fusion between plates 5 and 6 characterizes *P. bovaliorum*, *P. weitzmani* and most specimens of *P. callipterus* (five of seven C&S specimens). However, all three C&S specimens of *P. rhizophilus* have autogenous hypurals 5 and 6. Given that fusions between hypural plates are variable interspecifically among *Poecilocharax*, and intraspecifically within *P. callipterus*, we refrain from listing this characteristic as an additional diagnosis for the genus.

Among Crenuchinae, the highest count of pelvic-fin rays occurs in *C. spilurus*, which has one unbranched and eight or nine branched pelvic-fin rays. In *Poecilocharax*, this number is stable with one unbranched and seven branched rays (being the medialmost pelvic-fin ray variably unbranched in smaller specimens), which is similar to species of the subfamily Characidiinae (Buckup, 1993c). Yet, given that the relationships of the family Crenuchidae with other Characiformes remain controversial (e.g. Oliveira *et al.*, 2011; Arcila *et al.*, 2017; Mirande, 2019), it is impossible to establish if the seven branched rays of *Poecilocharax* is an apomorphic reduction

within crenuchins, or if it is a retained characiform plesiomorphy (and the increase in pelvic-fin ray count is autapomorphic in *Crenuchus spilurus*). Although still a diagnostic character separating *Poecilocharax* from *Crenuchus*, a proper polarization of this character awaits a comprehensive phylogenetic analysis of the family with a larger sampling of Crenuchidae.

A third and uncommon characteristic present in most species of *Poecilocharax* and shared with Characidiinae (Buckup, 1993c) is the presence of only two unbranched anal-fin rays. This condition contrasts with *P. rhizophilus* and *C. spilurus*, which have three unbranched anal-fin rays, being the anteriormost a small unbranched ray often covered by tissue (not visible in alcohol-preserved specimens). Given that this characteristic is not exclusive to *Poecilocharax*, it is not listed as a diagnosis for the genus. The lack of knowledge regarding Crenuchidae relationships in Characiformes hampers a proper polarization of this character. It is currently not possible to attest if two unbranched rays is a synapomorphy for Crenuchidae (making the extra unbranched anal-fin ray a reversal of *P. rhizophilus* and *C. spilurus*), or if the reduction of anal-fin rays occur homoplastically in both subfamilies.

Many of the above-mentioned characters that vary between *Poecilocharax* and *Crenuchus* are reductive features present in the former. For instance, miniaturization traits are present in two species of *Poecilocharax*: *P. weitzmani* and *P. rhizophilus*. Both species have a skeleton with noticeable reductive characteristics, with losses of the infraorbital plates 5 and 6 and of the extrascapula, and lack of the ossification of the supraneurals and the dorsal- and anal-fin distal radials (which are predominantly cartilaginous even in adults). *Poecilocharax weitzmani* and *P. rhizophilus* also have a severely truncated cephalic lateral-line system (*sensu* Pastana *et al.*, 2019), lacking the infraorbital, mandibular, otic, postotic and supratemporal canals. The lateral-line canals that are left still show reductive traits, noticeable as a posteriorly shortened supraorbital canal (lacking a parietal branch), a preopercular canal restricted to the horizontal axis of the preopercle and a trunk lateral-line lacking pored scales. Yet, *P. rhizophilus* is the only taxon in the genus that can be categorized as a miniature species (*sensu* Weitzman & Vari, 1988), as it is the only that does not exceed 26 mm SL. The largest specimen recorded was 23.3 mm SL (among 25 examined specimens) and sexual dimorphism was observed in specimens with less than 20 mm SL, indicating sexual maturity. According to Toledo-Piza *et al.* (2014), Crenuchidae includes 15 miniature species, with all of them belonging to Characidiinae. We list herein *P. rhizophilus* as the 16<sup>th</sup> miniature crenuchid species, and the first belonging to subfamily Crenuchinae.



DISTRIBUTION AND ENDEMISM OF *POECILOCHARAX*

The restricted distribution of the two species described herein may be the result of an allopatric or peripatric speciation of phylogenetically close species occurring in *Poecilocharax*. Like *P. callipterus* and *P. rhizophilus*, *P. bovaliorum* occurs in highland drainages, but is restricted to the Guiana Shield, being known only from the Potaro River in the Essequibo Basin, Guyana, in a distribution pattern similar to the disjunctive distribution already reported for other fish species (e.g. Lima & Ribeiro, 2011; Collins et al., 2018; Ohara et al., 2019).

*Poecilocharax bovaliorum* is found mainly in small 'terra firme' streams of black water (like *P. callipterus*) in the Essequibo Basin, although they can also occur with less frequency in others small drainages of clear water (Teixeira, pers. comm.). *Poecilocharax weitzmani* occurs in the black-water system of the Rio Negro, Solimões and Orinoco Basins. The right bank of the lower Rio Madeira has several black-water tributaries (e.g. Marmelos, Manicoré, Acari, Sucunduri and some tributaries of the Rio Aripuanã). The fish fauna of these rivers includes several species shared with others black-water rivers like the Rio Negro, Orinoco and Essequibo [e.g. *Acestrocephalus sardina* (Fowler, 1913), *Acestrocephalus grandoculis* Menezes & Géry, 1983, *Biotoecus opercularis* (Steindachner, 1875), *Creagrutus maxillaris* (Myers, 1927), *Dekeyseria scaphirhynchus* (Kner, 1854), *Hemigrammus coeruleus* Durbin, 1908, *H. stictus* (Durbin, 1909), *Heterocharax* spp., *Hoplarchus psittacus* (Heckel, 1840), *Hoplocharax goethei* Géry, 1966, *Hyphessobrycon rheophilus* Ohara et al., 2019, *Metynniss melanogrammus* Ota et al., 2016, *Pseudolithoxus kinja* Bifi et al., 2018, *Pygidianops* spp., *Rhinobrycon negrensis* Myers, 1944, *Satanoperca lilith* Kullander & Ferreira, 1988, *Symphysodon discus* Heckel, 1840 and *Thrissobrycon pectinifer* Böhlke, 1953]. Currently, these black-water systems are isolated from each other by the Rio Madeira, a large white-water river. Yet, the species distribution observed nowadays indicates a previous common history between the black-water tributaries of the Rio Madeira Basin and other black-water river systems of the region. The apparent disjunct distributions of species between black-water tributaries of the Rio Madeira and other black-water rivers may be explained by proximity between them, before the capture by the Rio Madeira at around 2 Mya (cf. Collins et al., 2018).

The two species of *Poecilocharax* described herein were captured in the drainages of Juma Plateau, a strand of the Brazilian Shield. They constitute the first records of the genus from the right bank tributaries of the Rio Amazonas Basin that drains the Brazilian Shield. Despite several studies conducted in the Rio Madeira (i.e. Queiroz et al., 2013a, b; Vieira et al., 2016; Costa et al., 2017), including the Rio Aripuanã

drainage (e.g. Camargo & Giarrizzo, 2007; Rapp Py-Daniel et al., 2007; Pedroza et al., 2012; Anjos et al., 2019), none reported the occurrence of *Poecilocharax* species, which is the reason why we list *Poecilocharax callipterus* and *P. rhizophilus* as endemic with a restricted distribution in the Brazilian highland. A similar distribution was reported for the rheophilic suckermouth catfish *Pseudolithoxus kinja* Bifi et al., 2018 (Siluriformes: Loricariidae), described from Rio Guariba (another Brazilian Shield tributary of the Rio Aripuanã) and representing the first record of a species of this genus from a right bank tributary of the Amazon River (Collins et al., 2018).

The Rio Aripuanã can be considered as a distinct tributary of the Rio Madeira Basin in Brazilian territory regarding its geomorphology, because this river has a series of great waterfalls along its length. Several species have been considered endemic from this drainage. Kullander (1995) and later Deprá et al. (2014) provided lists including 11 species of fishes occurring exclusively in the upper Rio Aripuanã. We expand this list to include 15 species described from the same drainage during the last few years (cf. Andrade et al., 2016b; Tencatt & Ohara, 2016a, b; Esguicero & Castro, 2017; Ohara et al., 2017a, b; Oliveira et al., 2017; Calegari et al., 2018; Dias et al., 2018; Garcia-Ayala & Benine, 2019; Shibatta, 2019; Kim et al., 2020; Menezes et al., 2020). Shibatta (2019) recently listed 26 endemic species for the Rio Aripuanã. We update Shibatta's list to add the new species described herein (*Poecilocharax callipterus* and *P. rhizophilus*), plus *Corydoras gracilis*, *Curculionichthys jumaorum* (Dias et al., 2018), *Curculionichthys scaius* Calegari et al., 2018, *Gymnotus aripuana* Kim et al., 2020, *Knodus angustus* Menezes et al., 2020 and *Poptella actenolepis* Garcia-Ayala & Benine, 2019. We also modify this list to remove *Potamoglanis anhangá* (Dutra et al., 2012), since it also occurs in the Amazonas and Tapajós Basins, and *Hyphessobrycon procyon* (MZUSP 122408) and *Inpaichthys kerri* Géry & Junk, 1977 (MZUSP 115795), both recently captured in the Tapajós Basin. The updated list contains 31 endemic species of fish known from the Rio Aripuanã.

## COMPARATIVE MATERIAL

*Erythrinidae*: BRAZIL. *Erythrinus erythrinus*: MZUSP 64702 (2, 76.3–112.9 mm SL) Amazonas State, Buriti river, Rio Tiquié Basin; MZUSP 43127 (3, 111.9–124.4 mm SL) São Paulo State, Rio Tietê Basin; MZUSP 81484 (4, 54.1–103.8 mm SL) Amazonas state, Açaí river, Rio Tiquié Basin.

*Characidiinae*: BRAZIL. *Melanocharacidium dispiloma* MZUSP 115699 (26, 22.7–31.9 mm SL)

Amazonas State, Rio Mutum, Rio Tapajós Basin; *Leptocharacidium osmopilus* MZUSP 108323 (1, 57.5 mm SL) Amazonas state, tributary of Rio Urubu, Rio Amazonas Basin; *Ammocryptocharax elegans* MZUSP 122241 (2, 40.3–40.7 mm SL) Amazonas state, tributary from Rio Roosevelt, Rio Aripuanã Basin; *Microcharacidium* sp. MZUSP 122569 (3, 14.1–16.9 mm SL) Amazonas state, Rio dos Couros, Rio Acari drainage; *Characidium lauroi* MZUSP 110359 (5, 39.2–46.4 mm SL) São Paulo state, Rio das Cobras, Paraíba do Sul drainage; *Elachocharax pulcher* MZUSP 122229 (6, 14.8–23.1 mm SL) Roraima State, Caicubi river, Rio Negro Basin; *Odontocharacidium aphanes* MZUSP 113226 (3, 12.1–13.5 mm SL) Roraima State, Caicubi river, Rio Negro Basin.

*Crenuchinae: Crenuchus spilurus*: BRAZIL: MZUSP 101986 (13, 18.6–32.9 mm SL), Amapá State, Ting Ling River, Rio Jari Basin. MZUSP 55115 (4, 20.9–35.2 mm SL), Amazonas State, river near Tapurucuara. GUYANA: MZUSP 62773 (30, 1 C&S, 26.4–46.3 mm SL), Demerara, black-water creek, Essequibo River Basin. *Poecilocharax bovaliorum*: GUYANA: Essequibo River Basin: USNM 120430 (1 cotype, 23.9 mm SL), Potaro River; USNM 344495 (4, 15.89–19.46 mm SL), Dakara Creek; USNM 204386 (10, 17.26–25.97 mm SL), Savannah Landing; USNM 343443 (9, 20.80–36.57 mm SL), Kaieteur National Park, tributary of upper Potaro River, just above Kaieteur Falls; USNM 327197 (4, 19.84–35.97 mm SL), black-water creek at Kaieteur National Park, tributary of upper Potaro River, just above Kaieteur Falls; MZUSP 109092 (6, 19.6–38.4 mm SL), Koribrong River; MZUSP 109160 (9, 12.9–31.7 mm SL), Amaila River; MZUSP 109026 (17, 15.7–31.9 mm SL), Koribrong River; MZUSP 109083 (12, 16.6–34.2 mm SL), Koribrong River; MZUSP 109010 (2, 22.8–23.6 mm SL), Koribrong River; MZUSP 109024 (11, 1C&S, 19.3–34.1 mm SL), Koribrong River; MZUSP108845 (2, 22.1–30.2 mm SL), Koribrong River; MZUSP 99749 (5, 19.8–27.7 mm SL), Potaro River; MZUSP 108881 (39, 10.4–35.4 mm SL), Kuribrong River. *Poecilocharax weitzmani*: BRAZIL: MZUSP 113449 (1, 22.1 mm SL), Roraima State, temporary pound on the side banks of Rio Pupunha, Rio Negro Basin. MZUSP 113390 (49, 15.1–22.9 mm SL), Roraima State, temporary pound on the side banks of Pupunha River, Rio Negro Basin. ZUEC PIS 15082 (4, 20.1–21.2 mm SL), Amazonas State, Tabatinga, small river at Urumutum road. INPA-ICT 9186 (12, 15.7–23.6 mm SL), Amazonas State, São Gabriel da Cachoeira, Rio Negro Basin. INPA-ICT 32819 (242, 14.9–20.2 mm SL), Amazonas State, first order creek near Novo Airão, Parque Nacional do Jaú, Rio Jaú Basin. INPA-ICT 36377 (24, 15.2–16.3 mm SL), Roraima State, Rio Anauá, Rio Branco Basin. INPA-ICT 38890 (34, 12.5–24.2 mm SL), Amazonas State,

Santa Isabel do Rio Negro, Rio Negro Basin. INPA-ICT 49036 (35, 12.5–24.2 mm SL), small creek on the left bank of Rio Japurá, Rio Japurá Basin. USNM 391811 (1, 50.8 mm SL – aquarium specimen), original locality data unknown; GUYANA: USNM 228091 (16, 17.5–24.1 mm SL), aquarium specimens out of Georgetown; VENEZUELA: USNM 270196 (25, 12.32–20.7 mm SL), Rio Platanillal on road from Puerto Ayacucho to Samariapo; USNM 270197 (133, 5 C&S, 14.6–20.6 mm SL), Rio Negro, Cano Tremblador, on road from San Carlos to Solano; USNM 270191 (3, 12.6–13.9 mm SL), Platanillal River on road from Puerto Ayacucho to Samariapo; USNM 270192 (8, 12.2–16.4 mm SL), small stream down road from Rio Paraíba Grande, c. 25 km from Puerto Ayacucho; USNM 270193 (8, 14.7–23.1 mm SL), flooded grassland, 2 km c. from San Carlos; USNM 270194 (24, 12.4–17.3 mm SL), Small cano crossed by road, 2 km south of Mirabel; USNM 270195 (6, 12.7–15.8 mm SL), Cano provincial, c. 20 km north of Puerto Ayacucho; USNM 270189 (14, 12.8–15.4 mm SL), Cano Chola, on road from San Carlos to Solano; USNM 222029 (22, 12.81–19.91 mm SL), small stream about 32 km from Puerto Ayacucho to Samariapo; BRAZIL: USNM 302071 (10, 15.1–17.4 mm SL), Amazonas State, rocks near Ilha Paraíso, Rio Negro Basin; USNM 302089 (1, 20.7 mm SL), Amazonas State, rocks near Ilha Paraíso, Rio Negro Basin; USNM 302094 (1, 15.6 mm SL), Amazonas State, Irere River, Caatinga lake, Rio Negro Basin; USNM 302102 (2, 15.1–18.2 mm SL), Amazonas State, Rio Negro Basin; USNM 302111 (34, 14.6–19.1 mm SL), Amazonas State, Rio Negro Basin; USNM 302121 (11, 12.19–17.68 mm SL) Amazonas State, Rio Irere, Caatinga lake, Rio Negro Basin. *Poecilocharax* sp.: BRAZIL: all from Amazonas state, São Gabriel da Cachoeira: ZUEC PIS 16201 (14, 17.5–24.3 mm SL) Uacatuna River; ZUEC PIS 16172 (49, 11.2–20.1 mm SL) small river near dirt road.

#### ACKNOWLEDGEMENTS

The authors are grateful to L. Rapp Py-Daniel, C. Ribas, S. Hashimoto (INPA) and C. Oliveira (UNESP) for curatorial assistance, loan of specimens and donation of tissue samples. Sequence data for the species *Poecilocharax bovaliorum* and *P. weitzmani* (LBP 40500) were provided by C. Oliveira and E. Rodrigues (UNESP/Mamirauá Institute). The authors are grateful to V. Abrahão, O. Oyakawa (MZUSP) and T. Teixeira (PUC-MG) for help and assistance during fieldwork. M. Gianeti (MZUSP) helped in curatorial assistance and T. Teixeira provided thoughtful comments on the description of sexual dimorphism of Crenuchinae. SEM images were taken by L. Guimarães (MZUSP). Part of the type series was

collected during an expedition funded by the South American Characiformes Inventory project (FAPESP Grant # 2011/502827). Authors received financial support from Fundação de Amparo à Pesquisa do Estado de São Paulo (FAPESP) (WMO: grant number 2013/22473-8; PC: grant numbers 2012/00840-6, 2016/03966-1, 2016/19075-9 and 2017/09321-5), Coordenação de Aperfeiçoamento de Pessoal de Nível Superior - Brasil (CAPES) - Finance Code 001, Sara E. and Bruce B. Collette Postdoctoral Fellowship in Systematic Ichthyology (MNLP) and Conselho Nacional de Desenvolvimento Científico e Tecnológico (CNPq) (PC: grant number 423760/2018-1).

#### DATA AVAILABILITY

DNA sequence data that support the findings of this study have been deposited in the GenBank database with the following accession codes ON041209, ON042212, ON059686, ON062375, ON063012, ON063015, ON063016, ON063044, ON067464, ON067495, ON067498, ON067500, ON067501, ON067502 and ON076904.

#### REFERENCES

- Aguirre WE, Navarrete R, Malato G, Calle P, Loh MK, Vital WF, Vu V, Shervette VR, Granda JC. 2016.** Body shape variation and population genetic structure of *Rhoadsia altipinna* (Characidae: Rhoadsiinae) in southwestern Ecuador. *Copeia* **104**: 554–569.
- Alexander R. 1963.** Frontal foramina and tripodes of the characin *Crenuchus*. *Nature* **200**: 1225.
- Andrade MC, Jégu M, Giarrizzo T. 2016a.** A new large species of *Myloplus* (Characiformes, Serrasalminae) from the Rio Madeira Basin, Brazil. *ZooKeys* **571**: 153–167.
- Andrade MC, de Sousa LM, Ota RP, Jégu M, Giarrizzo T. 2016b.** Redescription and geographical distribution of the endangered fish *Ossubtus xinguense* Jégu 1992 (Characiformes, Serrasalminae) with comments on conservation of the rheophilic fauna of the Xingu River. *PLoS One* **11**: 1–29.
- Andrade MC, Machado VN, Jégu M, Farias IP, Giarrizzo T. 2017.** A new species of *Tometes* Valenciennes 1850 (Characiformes: Serrasalminae) from Tocantins-Araguaia River Basin based on integrative analysis of molecular and morphological data. *PLoS One* **12**: e01700531–e01700531.
- Anjos MRD, Machado NG, Pedersoli MA, Pedersoli NRB, Barros BS, Lourenço IH, Barreiros JP. 2019.** Survey of fish species from the Lower Roosevelt River, southwestern Amazon basin. *Biota Neotropica* **19**: e20180717.
- April J, Mayden RL, Hanner RH, Bernatchez L. 2011.** Genetic calibration of species diversity among North America's freshwater fishes. *Proceedings of the National Academy of Sciences of the USA* **108**: 10602–10607.
- Arcila D, Ortí G, Vari R, Armbruster JW, Stiassny MLJ, Ko KD, Sabaj MH, Lundberg J, Revell LJ, Betancur-RR. 2017.** Genome wide interrogation advances resolution of recalcitrant groups in the tree of life. *Nature Ecology & Evolution* **1**: 0020.
- Barreto SB, Silva AT, Batalha-Filho H, Affonso PRAM, Zanata AM. 2018.** Integrative approach reveals a new species of *Nematocharax* (Teleostei: Characidae). *Journal of Fish Biology* **93**: 1–12.
- Bassett DK, Carton AG, Montgomery JC. 2006.** Flowing water decreases hydrodynamic signal detection in a fish with an epidermal lateral-line system. *Marine Freshwater Research* **57**: 611–617.
- Beckmann M, Erös T, Schmitz A, Bleckmann H. 2010.** Number and distribution of superficial neuromasts in twelve common European cypriniform fishes and their relationship to habitat occurrence. *International Review of Hydrobiology* **95**: 273–284.
- Beltrão HDB, Magalhães ERS, Costa SB, Loebens SC, Yamamoto KC. 2018.** Ictiofauna do maior fragmento florestal da Amazônia: sobrevivendo ao concreto e a poluição. *Neotropical Biology and Conservation* **13**: 124–137.
- Benine RC, Lopes GAM. 2007.** A new species of *Hemigrammus* Gill, 1858 (Characiformes: Characidae) from Río Caura, Venezuela. *Zootaxa* **1610**: 53–59.
- Betancur-R R, Arcila D, Vari RP, Hughes LC, Oliveira C, Sabaj MH, Ortí G. 2019.** Phylogenomic incongruence, hypothesis testing, and taxonomic sampling: the monophyly of Characiform fishes. *Evolution* **73**: 329–345.
- Blair C, Bryson RW Jr. 2017.** Cryptic diversity and discordance in single-locus species delimitation methods within horned lizards (Phrynosomatidae: Phrynosoma). *Molecular Ecology Resources* **17**: 1168–1182.
- Borghazan EDA, Pinto KDS, Zuanon J, Pires THDS. 2019.** Someone like me: size-assortative pairing and mating in an Amazonian fish, sailfin tetra *Crenuchus spilurus*. *PLoS One* **14**: e0222880.
- Bossy J, Delage J, Géry J. 1965.** Interprétation histomorphologique de l'organe frontal des Crenuchidae. *Comptes Rendus de l'Académie Sciences* **262**: 4837–4840.
- Buckup PA. 1993a.** The monophyly of the Characidiinae, a Neotropical groups of characiform fishes (Teleostei: Ostariophysi). *Zoological Journal of the Linnean Society* **108**: 225–245.
- Buckup PA. 1993b.** Phylogenetic interrelationships and reductive evolution in the neotropical characidiin fishes. *Cladistics* **9**: 305–341.
- Buckup PA. 1993c.** Review of the characidiin fishes (Teleostei: Characiformes), with description of four new genera and ten new species. *Ichthyological Exploration of Freshwaters* **4**: 97–154.
- Buckup PA. 1998.** Relationships of the Characidiinae and phylogeny of characiform fishes (Teleostei: Ostariophysi). In: Malabarba LR, Reis RE, Vari RP, Lucena ZM, Lucena CA, eds. *Phylogeny and classification of neotropical fishes*. Porto Alegre: Edipucrs, 123–144.
- Buckup PA. 2003.** Family Crenuchidae (South American darters). In: Reis RE, Kullander SO, Ferraris CJ Jr, eds.

- Check list of the freshwater fishes of South and Central America*. Porto Alegre: Edipucrs, 87–95.
- Buckup PA, Hahn L. 2000.** *Characidium vestigipinne*: a new species of Characidiinae (Teleostei, Characiformes) from southern Brazil. *Copeia* **2000**: 150–155.
- Buckup PA, Van der Sleen P. 2017.** Family Crenuchidae. In: Van der Sleen P, Albert JS, eds. *Field guide to the fishes of the Amazon, Orinoco, and Guianas*. Princeton: Princeton University Press, 142–148.
- Bührnheim CM, Malabarba LR. 2006.** Redescription of the type species of *Odontostilbe* Cope, 1870 (Teleostei: Characidae: Cheirodontinae), and description of three new species from the Amazon basin. *Neotropical Ichthyology* **4**: 167–196.
- Bührnheim CM, Malabarba LR. 2007.** Redescription of *Odontostilbe pulchra* (Gill, 1858) (Teleostei: Characidae: Cheirodontinae), and description of two new species from the Río Orinoco Basin. *Neotropical Ichthyology* **5**: 1–20.
- Calcagnotto D, Schaefer SA, DeSalle R. 2005.** Relationships among characiform fishes inferred from analysis of nuclear and mitochondrial gene sequences. *Molecular Phylogenetics and Evolution* **36**: 135–153.
- Calegari BB, Gamarra SP, Reis RE. 2018.** A new species of *Curculionichthys* (Siluriformes: Hypoptopomatinae) from the western border of the Brazilian Shield, Madeira River Basin, Brazil. *Copeia* **106**: 663–670.
- Camargo M, Giarrizzo T. 2007.** Fish, Marmelos Conservation Area (BX044), Madeira River Basin, states of Amazonas and Rondônia, Brazil. *Check List* **3**: 291–296.
- Camelier P, Menezes NA, Costa-Silva GJ, Oliveira C. 2018.** Molecular and morphological data of the freshwater fish *Glandulocauda melanopleura* (Characiformes: Characidae) provide evidences of river captures and local differentiation in the Brazilian Atlantic Forest. *PLoS One* **13**: e0194247.
- Cardoso A. 2003.** *Sistemática e filogenia da subfamília Rhoadsiinae (Teleostei: Characiformes: Characidae)*. Unpublished Master Thesis, Pontifícia Universidade Católica de Rio Grande do Sul, Porto Alegre, 81.
- Carstens BC, Pelletier RA, Reid NM, Satler JD. 2013.** How to fail at species delimitation. *Molecular Ecology* **22**: 4369–4383.
- Collins RA, Bifi AG, de Oliveira RR, Ribeiro ED, Lujan NK, Rapp Py-Daniel LH, Hrbek T. 2018.** Biogeography and species delimitation of the rheophilic suckermouth catfish genus *Pseudolithoxus* (Siluriformes: Loricariidae), with the description of a new species from the Brazilian Amazon. *Systematics and Biodiversity* **16**: 538–550.
- Costa ID, Ohara WM, Almeida MS. 2017.** Fishes from the Jaru Biological Reserve, Machado River drainage, Madeira River basin, Rondônia, Brazil. *Biota Neotropica* **7**: e20160315.
- Dahl G. 1960.** New fresh-water fishes from western Colombia. *Caldasia* **8**: 451–484.
- Deprá GC, Kullander SO, Pavanelli CS, da Graça WJ. 2014.** A new colorful species of *Geophagus* (Teleostei: Cichlidae), endemic to the Rio Aripuanã in the Amazon Basin of Brazil. *Neotropical Ichthyology* **12**: 737–746.
- Dias AC, Silva GSC, Oliveira C, Roxo FF. 2018.** A new species of *Hisonotus* (Siluriformes: Loricariidae) from Aripuanã river, Amazon Basin, Brazil. *Zootaxa* **4504**: 577–585.
- Dijkgraaf S. 1963.** The functioning and significance of the lateral-line organs. *Biological Reviews of the Cambridge Philosophical Society* **38**: 51–105.
- Dutra GM, Wosiacki WB, de Pinna MCC. 2012.** *Trichomycterus anhangá*, a new species of miniature catfish related to *T. hasemani* and *T. johnsoni* (Siluriformes: Trichomycteridae) from the Amazon basin, Brazil. *Neotropical Ichthyology* **10**: 225–231.
- Edgar R. 2004.** Muscle: a multiple sequence alignment method with reduced time and space complexity. *BMC Bioinformatics* **5**: 1–19.
- Eigenmann CH. 1909.** Reports on the expedition to British Guiana of the Indiana University and the Carnegie Museum, 1908. Report no. 1. Some new genera and species of fishes from British Guiana. *Annals of the Carnegie Museum* **6**: 4–54.
- Eigenmann CH. 1920.** The fishes of Lake Valencia, Caracas, and of the Rio Tuy at El Concejo, Venezuela. (Contrib. Zool. Lab. Ind. Univ. No. 170). *Indiana University Studies* **7**: 1–13.
- Engelmann J, Hanke W, Bleckmann H. 2002.** Lateral line reception in still- and running water. *Journal of Comparative Physiology. A, Neuroethology, Sensory, Neural, and Behavioral Physiology* **188**: 513–526.
- Engelmann J, Kröther S, Bleckmann H, Mogdans J. 2003.** Effects of running water on lateral line responses to moving objects. *Brain Behavior and Evolution* **61**: 195–212.
- Esguícero ALH, Castro RMC. 2017.** Taxonomic revision of the genus *Aphyodite*, with description of two new species (Teleostei: Characidae). *Copeia* **105**: 753–764.
- Fonseca A, Amorim L, Ribeiro J, Ferreira R, Monteiro A, Santos B, Souza C Jr, Veríssimo A. 2021.** *Boletim do desmatamento da Amazônia Legal (abril 2021) SAD (1)*. Belém: Imazon.
- Fink WL, Weitzman SH. 1974.** The so-called cheirodontin fishes of Central America with description of two new species (Pisces: Characidae). *Smithsonian Contributions to Zoology* **172**: 1–46.
- Fricke R, Eschmeyer WN, Fong JD. 2021a.** Eschmeyer's catalog of fishes: genera/species by family/subfamily. Available at: <http://researcharchive.calacademy.org/research/ichthyology/catalog/SpeciesByFamily.asp>. Accessed 15 January 2021.
- Fricke R, Eschmeyer WN, Van der Lann R, eds. 2021b.** Eschmeyer's catalog of fishes: genera, species, references. Available at: <http://researcharchive.calacademy.org/research/ichthyology/catalog/fishcatmain.asp>. Accessed 15 January 2021.
- Froese R, Pauly D. 2000.** *FishBase: concepts, design and data sources*. Los Baños, Philippines: ICLARM. Available at: [www.fishbase.org](http://www.fishbase.org). Accessed 15 January 2021.
- García-Ayala JR, Benine RC. 2019.** A new species of *Poptella* (Characiformes: Characidae: Stethaprioninae) from the Rio Juma, Rio Madeira Basin, Brazil. *Neotropical Ichthyology* **17**: 1–8.
- Graça WJ, Pavanelli CS, Buckup PA. 2008.** Two new species of *Characidium* (Characiformes: Crenuchidae) from Paraguay and Xingu River Basins, state of Mato Grosso, Brazil. *Copeia* **2008**: 326–332.
- Graça WJ, Ota RR, Domingues WM. 2019.** A new species of miniature *Characidium* (Characiformes: Crenuchidae) from

- the upper Rio Paraguay Basin, Mato Grosso State, Brazil. *Journal of Fish Biology* **95**: 1480–1485.
- Gelman A, Donal BR. 1992.** Inference from iterative simulation using multiple sequences. *Statistical Science* **7**: 457–472.
- Géry J. 1963.** Paried frontal foramina in living teleosts: definition of a new family of Characoid Fishes, the Chrenuchidae. *Nature* **198**: 502–503.
- Géry J. 1965.** Poissons characoides Sud-Américains du Senckenberg Muséum, II. Characidae et Crenuchidae de l'Igarapé Prêto (Haute Amazonie). *Senckenbergiana Biologica* **46**: 195–218, pls. 18, 18a.
- Géry J. 1971.** Une sous-famille nouvelle de poissons Characoides Sud-Américains: les Geisleriinae. *Vie et Milieu, Série C, Biologie Terrestre* **22**: 153–166.
- Goloboff PA, Catalano SA. 2016.** TNT v.1.5, including a full implementation of phylogenetic morphometrics. *Cladistics* **32**: 221–238.
- Günther A. 1863.** On new species of fishes from the Essequibo. *Annals and Magazine of Natural History* **12**: 441–443.
- Günther A. 1864.** *Catalogue of the fishes in the British Museum, Vol. 5. Catalogue of the Physostomi, containing the families Siluridae, Characinidae, Haplochitonidae, Sternoptychidae, Scopelidae, Stomiidae in the collection of the British Museum.* London: British Museum.
- Hall TA. 1999.** BioEdit: a user-friendly biological sequence alignment editor and analysis program for Windows 95/98/NT. *Nucleic Acids Symposium Series* **41**: 95–98.
- IUCN Standards and Petitions Subcommittee. 2019.** *Guidelines for using the IUCN Red List Categories and Criteria, v.14. Prepared by the Standards and Petitions Subcommittee.* Available at: <http://www.iucnredlist.org/documents/RedListGuidelines.pdf>
- Jégu M, Santos GM, Ferreira E. 1989.** Une nouvelle espèce du genre *Mylesinus* (Pisces, Serrasalminae), *M. paraschomburgkii*, décrite des bassins du Trombetas et du Uatuma (Brésil, Amazonie). *Revue d'Hydrobiologie Tropicale* **22**: 49–62.
- Kearse M, Moir R, Wilson A, Stones-Havas S, Cheung M, Sturrock S, Buxton S, Cooper A, Markowitz S, Duran C, Thierer T, Ashton B, Meintjes P, Drummond A. 2012.** Geneious Basic: an integrated and extendable desktop software platform for the organization and analysis of sequence data. *Bioinformatics* **28**: 1647–1649.
- Kim LY, Crampton WGR, Albert JS. 2020.** Two new species of *Gymnotus* (Gymnotiformes: Gymnotidae) from Brazil and Historical biogeography of the subgenus *Lamontianus*. *Copeia* **108**: 468–484.
- Kullander SO. 1995.** Three new cichlid species from southern Amazonia: *Aequidens gerciliae*, *A. epae* and *A. michaeli*. *Ichthyological Exploration of Freshwaters* **6**: 149–170.
- Kumar S, Stecher G, Li M, Knyaz C, Tamura K. 2018.** MEGA X: molecular evolutionary genetics analysis across computing platforms. *Molecular Biology and Evolution* **35**: 1547–1549.
- Lima FCT, Ribeiro AC. 2011.** Continental-scale tectonic controls of biogeography and ecology. In: Albert JS, Reis RE, eds. *Historical biogeography of Neotropical freshwater fishes.* Berkeley: University of California Press, 145–164.
- Machado-Allison A. 1983.** Estudios sobre la sistemática de la subfamilia Serrasalminae (Teleostei, Characidae). Parte II. Discussion sobre la condición monofletica de la subfamilia. *Acta Biologica Venezuelica* **11**: 145–195.
- Marinho MMF, Menezes NA. 2017.** Taxonomic review of *Copella* (Characiformes: Lebiasinidae) with an identification key for the species. *PLoS One* **12**: e0183069: 1–53.
- Malabarba LR, Jerep FC. 2014.** Review of the species of the genus *Serrapinnus* Malabarba, 1998 (Teleostei: Characidae: Cheirodontinae) from the Rio Tocantins-Araguaia Basin, with description of three new species. *Zootaxa* **3847**: 57–79.
- Melo MRS, Buckup PA. 2002.** *Characidium stigmosum* (Characiformes: Crenuchidae): a new species of characidiin fish from central Brazil. *Copeia* **2002**: 988–993.
- Melo MRS, Espindola VC. 2016.** Description of a new species of *Characidium* Reinhardt, 1867 (Characiformes: Crenuchidae) from the Chapada Diamantina, Bahia, and redescription of *Characidium bimaculatum* Fowler, 1941. *Zootaxa* **4196**: 552–568.
- Melo MRS, Oyakawa OT. 2015.** A new species of *Characidium* Reinhardt (Characiformes, Crenuchidae) with a distinctively dimorphic male. *Copeia* **103**: 281–289.
- Melo BF, Benine RC, Mariguela TC, Oliveira C. 2011.** A new species of *Tetragonopterus* Cuvier, 1816 (Characiformes: Characidae: Tetragonopterinae) from the iRo Jari, Amapá, northern Brazil. *Neotropical Ichthyology* **9**: 49–56.
- Mendonça MB, Netto-Ferreira AL. 2015.** New species of *Characidium* (Characiformes: Crenuchidae) from the Rio Tapajós and Rio Xingu drainages, Pará, Brazil. *Zootaxa* **4021**: 187–194.
- Menezes NA, Géry J. 1983.** Seven new acestrorhynchin characid species (Osteichthyes, Ostariophysii, Characiformes) with comments on the systematics of the group. *Revue Suisse de Zoologie* **90**: 563–592.
- Menezes NA, Lucena CAS. 2014.** A taxonomic review of the species of *Charax* Scopoli, 1777 (Teleostei: Characidae: Characinae) with description of a new species from the Rio Negro bearing superficial neuromasts on body scales, Amazon Basin, Brazil. *Neotropical Ichthyology* **12**: 193–228.
- Menezes NA, Zanata AM, Camelier P. 2015.** *Nematocharax costai* Bragança, Barbosa & Mattos a junior synonym of *Nematocharax venustus* Weitzman, Menezes & Britski (Teleostei: Characiformes: Characidae). *Zootaxa* **3920**: 453–462.
- Menezes NA, Ferreira KM, Netto-Ferreira AL. 2020.** A new species of *Knodus* (Characiformes: Characidae: Stevardiinae) from the Rio Aripuanã, Rio Madeira Basin, Brazil. *Neotropical Ichthyology* **18**: e190139, 1–14.
- Merrilees MJ, Crossman EJ. 1973a.** Surface pits in the family Esocidae I. Structure and types. *Journal of Morphology* **141**: 307–320.
- Merrilees MJ, Crossman EJ. 1973b.** Surface pits in the family Esocidae II. Epidermal dermal interactions and evidence for aplasia of the lateral line sensory system. *Journal of Morphology* **141**: 321–344.
- Miller MA, Pfeiffer W, Schwartz T. 2010.** Creating the CIPRES Science Gateway for inference of large phylogenetic

- trees. In: *2010 Gateway Computing Environments Workshop (GCE)*. 1–8. Available at: [http://www.phylo.org/sub\\_sections/portal/cite.php](http://www.phylo.org/sub_sections/portal/cite.php)
- Mirande JM. 2009.** Weighted parsimony phylogeny of the family Characidae (Teleostei: Characiformes). *Cladistics* **25**: 574–613.
- Mirande JC. 2019.** Morphology, molecules and the phylogeny of Characidae (Teleostei: Characiformes). *Cladistics* **35**: 282–300.
- Moreira CR, Landim MI, Costa WJEM. 2002.** *Hyphessobrycon heliacus*: a new characid fish (Ostariophysi: Characiformes) from the upper Rio Tapajós Basin, central Brazil. *Copeia* **2002**: 428–432.
- Netto-Ferreira AL, Birindelli JLO, Buckup PA. 2013b.** A new miniature species of *Characidium* Reinhardt (Ostariophysi: Characiformes: Crenuchidae) from the headwaters of the Rio Araguaia, Brazil. *Zootaxa* **3664**: 361–368.
- Netto-Ferreira AL, Birindelli JLO, Sousa LM, Mariguela TC, Oliveira C. 2013a.** A new miniature characid (Ostariophysi: Characiformes: Characidae), with phylogenetic position inferred from morphological and molecular data. *PLoS One* **8**: 1–7.
- Nylander JAA. 2014.** *MrModeltest v.2*. Programme distributed by the author. Evolutionary Biology Centre, Uppsala University.
- Ohara WM, Abrahão VP, Espíndola VC. 2017a.** *Hyphessobrycon platyodus* (Teleostei: Characiformes), a new species from the Rio Madeira Basin, Brazil, with comments on how multicuspid teeth relate to feeding habits in Characidae. *Journal of Fish Biology* **91**: 835–850.
- Ohara WM, Lima FCT, Salvador GN, Andrade MC. 2017b.** *Peixes do rio Teles Pires: diversidade e guia de identificação*. Goiânia: Gráfica e Editora Amazonas, 408.
- Ohara WM, Teixeira TF, Alborno-Garzón JG, Mirande JM, Lima FCT. 2019.** *Hyphessobrycon rheophilus*, a new species from rapids of the Amazon and Orinoco river basins (Characiformes: Characidae: Stethaprioninae). *Zootaxa* **4712**: 561–575.
- Oliveira C, Avelino GS, Abe KT, Mariguela TC, Benine RC, Ortí G, Vari RP, Castro RMC. 2011.** Phylogenetic relationships within the speciose family Characidae (Teleostei: Ostariophysi: Characiformes) based on multilocus analysis and extensive ingroup sampling. *BMC Evolutionary Biology* **11**: 1–25.
- Oliveira AS, Rapp Py-Daniel LH, Zawadzki CH. 2017.** A new species of *Aphanotorulus* (Siluriformes: Loricariidae) from the Rio Aripuanã Basin, Brazil. *Neotropical Ichthyology* **15**: 1–10.
- Ortí G, Meyer A. 1997.** The radiation of characiform fishes and the limits of resolution of mitochondrial ribosomal DNA sequences. *Systematic Biology* **46**: 75–100.
- Ota RP, Machado VN, Andrade MC, Collins RA, Farias IP, Hrbek T. 2020.** Integrative taxonomy reveals a new species of pacu (Characiformes: Serrasalminae: *Myloplus*) from the Brazilian Amazon. *Neotropical Ichthyology* **18**: e190112.
- Pansonato-Alves JC, Serrano EA, Camacho JPM, Utsunomia R, Silva GJC, Oliveira C, Foresti F. 2014.** Single origin of sex chromosomes and multiple origins of B chromosomes in fish of the genus *Characidium*. *PLoS One* **9**: e107169.
- Pastana MNL, Ohara WM. 2016.** A new species of *Hyphessobrycon* Durbin (Characiformes: Characidae) from Rio Aripuanã, Rio Madeira Basin, Brazil. *Zootaxa* **4161**: 386–398.
- Pastana MNL, Dagosta FCP, Esguícero ALH. 2017.** A new sexually dichromatic miniature *Hyphessobrycon* (Teleostei: Characiformes: Characidae) from the Rio Formiga, upper Rio Juruena Basin, Mato Grosso, Brazil, with a review of sexual dichromatism in Characiformes. *Journal of Fish Biology* **91**: 1301–1318.
- Pastana MNL, Bockmann FA, Datovo A. 2019.** The cephalic lateral-line system of Characiformes (Teleostei: Ostariophysi): anatomy and phylogenetic implications. *Zoological Journal of the Linnean Society* **189**: 1–46.
- Pedroza WS, Ribeiro FRV, Teixeira TF, Ohara WM, Rapp Py-Daniel LHR. 2012.** Ichthyofaunal survey of stretches of the Guariba and Roosevelt rivers, in Guariba State Park and Guariba Extractive Reserve, Madeira River Basin, Amazonas, Brazil. *Check List* **8**: 8–15.
- Pereira LHG, Hanner R, Foresti F, Oliveira C. 2013.** Can DNA barcoding accurately discriminate megadiverse Neotropical freshwater fish fauna? *BMC Genetics* **14**: 1–14.
- Pires THS, Farago TB, Campos DF, Cardos GM, Zuanon J. 2016.** Traits of a lineage with extraordinary geographical range: ecology, behavior and life-history of the sailfin tetra *Crenuchus spilurus*. *Environmental Biology of Fishes* **99**: 925–937.
- Poulson TL. 1963.** Cave adaptation in amblyopsid fishes. *American Midland Naturalist* **70**: 257–290.
- Presswell B, Weitzman SH, Bergquist T. 2000.** *Skiotocharax meizon*, a new genus and species of fish from Guyana with a discussion of its relationships (Characiformes: Crenuchidae). *Ichthyological Exploration of Freshwaters* **11**: 175–192.
- Puillandre N, Lambert A, Brouillet S, Achaz G. 2012.** ABGD, automatic barcode gap discovery for primary species delimitation. *Molecular Ecology* **21**: 1864–1877.
- Queiroz LJ, Torrente-Vilara G, Ohara WM, Pires THS, Zuanon J, Doria CRC. 2013a.** *Peixes do Rio Madeira*. São Paulo: Dialeto Latin American Documentary.
- Queiroz LJ, Torrente-Vilara G, Vieira FG, Ohara WM, Zuanon J, Doria CR. 2013b.** Fishes of Cuniã Lake, Madeira River Basin, Brazil. *Check List* **9**: 540–548.
- Rambaut A, Drummond AJ. 2009.** *Tracer, v. 1.5*.
- Rapp Py-Daniel LH, Deus CP, Ribeiro OM, Sousa LM. 2007.** Peixes. In: Rapp Py-Daniel LH, Deus CP, Henriques AL, Pimpão DM, Ribeiro OM, eds. *Biodiversidade do Médio Madeira: bases científicas para proposta de conservação*. Manaus: MMA/MCT, 89–125.
- Rizzato PP, Bichuette ME. 2016.** The laterosensory canal system in epigeal and subterranean *Ituglanis* (Siluriformes: Trichomycteridae), with comments about troglomorphy and the phylogeny of the genus. *Journal of Morphology* **278**: 4–28.

- Rodrigues EKQ, Netto-Ferreira AL. 2020. A new miniature species of *Odontocharacidium* (Characiformes: Crenuchidae) from the Río Orinoco Basin, Venezuela. *Neotropical Ichthyology* **18**: 1–11.
- Ronquist F, Teslenko M, Van der Mark P, Ayres DL, Darling A, Höhna S, Larget B, Liu L, Suchard MA, Huelsenbeck JP. 2012. MrBayes 3.2: efficient Bayesian phylogenetic inference and model choice across a large model space. *Systematic Biology* **61**: 539–542.
- Sabaj MH. 2020. Codes for Natural history collections in ichthyology and herpetology. *Copeia* **108**: 593–669.
- Scacchetti PC, Utsunomia R, Pansonato-Alves JC, Costa-Silva GJ, Oliveira C, Foresti F. 2015. Extensive spreading of interstitial telomeric sites on the chromosomes of *Characidium* (Teleostei, Characiformes). *Genetica* **143**: 263–270.
- Schmitz A, Bleckmann H, Mogdans J. 2008. Organization of the superficial neuromast system in goldfish, *Carassius auratus*. *Journal of Morphology* **269**: 751–761.
- Schmitz A, Bleckmann H, Mogdans J. 2014. The lateral line receptor array of cyprinids from different habitats. *Journal of Morphology* **275**: 357–370.
- Shibatta OA. 2019. New species of bumblebee catfish of the genus *Batrochoglanis* Gill, 1858 (Siluriformes: Pseudopimelodidae) from the Aripuanã River Basin, Mato Grosso, Brazil. *Zootaxa* **4674**: 243–263.
- Stamatakis A. 2014. RAxML v.8: a tool for phylogenetic analysis and post-analysis of large phylogenies. *Bioinformatics* **30**: 1312–1313.
- Swofford DL. 1998. *PAUP\*. phylogenetic analysis using parsimony (\*and other methods), v.4.0*. Sunderland: Sinauer Associates.
- Taylor WR, Van Dyke GC. 1985. Revised procedures for staining and clearing small fishes and other vertebrates for bone and cartilage study. *Cybium* **9**: 107–119.
- Teixeira TF, Melo MRS. 2021. A new species of *Characidium* Reinhardt (Characiformes: Crenuchidae) from the Río Huallaga, central Peruvian Amazon, with a review on secondary sexual characters in the genus. *Journal of Fish Biology* **98**: 178–188.
- Tencatt LFC, Ohara WM. 2016a. Two new species of *Corydoras* Lacépède, 1803 (Siluriformes: Callichthyidae) from the Rio Madeira Basin, Brazil. *Neotropical Ichthyology* **14**: 139–154.
- Tencatt LFC, Ohara WM. 2016b. A new long-snouted species of *Corydoras* Lacépède, 1803 (Teleostei: Callichthyidae) from the rio Madeira basin. *Zootaxa* **4133**: 430–442.
- Toledo-Piza M, Mattox GMT, Britz R. 2014. *Priocharax nanus*, a new miniature characid from the Rio Negro, Amazon Basin (Ostariophysi: Characiformes), with an updated list of miniature Neotropical freshwater fishes. *Neotropical Ichthyology* **12**: 229–246.
- Vieira FG, Matsuzaki AA, Barros BSF, Ohara WM, Paixão AC, Torrente-Vilara G, Zuanon J, Doria CRC. 2016. *Catálogo de Peixes da Estação Ecológica de Cuniã*. Porto Velho: Edufro, 109.
- Vischer HA. 1990. The morphology of the lateral line system in 3 species of Pacific cottoid fishes occupying disparate habitats. *Experientia* **46**: 244–250.
- Ward RD, Zemlak TS, Innes BH, Last PR, Hebert PND. 2005. DNA barcoding Australia's fish species. *Philosophical Transactions of the Royal Society B: Biological Sciences* **360**: 1847–1857.
- Ward RD, Hanner R, Hebert PND. 2009. The campaign to DNA barcode all fishes, FISH-BOL. *Journal of Fish Biology* **74**: 329–356.
- Weitzman SH. 1964. Osteology and relationships of South American characid fishes of subfamilies Lebiasininae and Erythrininae with special reference to subtribe Nannostomina. *Proceedings of the United States National Museum* **116**: 127–169.
- Weitzman SH, Fink WL. 1983. Relationships of the neon tetras, a group of South American freshwater fishes (Teleostei, Characidae), with comments on the phylogeny of New World characiforms. *Bulletin of the Museum of Comparative Zoology* **150**: 339–395.
- Weitzman SH, Géry J. 1981. The relationships of the South American pygmy characid fishes of the genus *Elachocharax*, with a redescription of *Elachocharax junki* (Teleostei: Characidae). *Proceedings of the Biological Society of Washington* **93**: 887–913.
- Weitzman SH, Kanazawa RH. 1976. *Ammocryptocharax elegans*, a new genus and species of riffle-inhabiting characid fish (Teleostei: Characidae) from South America. *Proceedings of the Biological Society of Washington* **89**: 325–346.
- Weitzman SH, Kanazawa RH. 1977. A new species of pygmy characid fish from the Rio Negro and Rio Amazonas, South America (Teleostei: Characidae). *Proceedings of the Biological Society of Washington* **90**: 149–160.
- Weitzman SH, Vari RP. 1988. Miniaturization in South American freshwater fishes; an overview and discussion. *Proceedings of the Biological Society of Washington* **101**: 444–465.
- Weitzman SH, Menezes NA, Britski HA. 1986. *Nematocharax venustus*, a new genus and species of fish from the Rio Jequitinhonha, Minas Gerais, Brazil. *Proceedings of the Biological Society of Washington* **99**: 335–346.
- Xia X. 2013. DAMBE5: a comprehensive software package for data analysis in molecular biology and evolution. *Molecular Biology and Evolution* **30**: 1720–1728.
- Xia X, Lemey P. 2009. Assessing substitution saturation with DAMBE. In: Lemey P, Salemi M, Vandamme AM, eds. *The phylogenetic handbook: a practical approach to DNA and protein phylogeny*. Cambridge: Cambridge University Press, 615–630.
- Xia X, Xie Z, Salemi M, Chen L, Wang Y. 2003. An index of substitution saturation and its application. *Molecular Phylogenetics and Evolution* **26**: 1–7.
- Zanata AM, Vari RP. 2005. The family Alestidae (Ostariophysi, Characiformes): a phylogenetic analysis of a trans-Atlantic clade. *Zoological Journal of the Linnean Society* **145**: 1–144.
- Zarske A. 1997. *Geryichthys sterbai* gen. et spec. nov. and *Microcharacidium geryi* spec. nov.: Beschreibung einer neuen Gattung und zweier neuer Arten von Bodensalmlern aus dem Einzugsgebiet des Rio Ucayali in Peru (Teleostei: Ostariophysi: Characiformes: Characidiidae). *Zoologische Abhandlungen. Staatliches Museum für Tierkunde in Dresden* **49**: 157–172.

**Zarske A. 2010.** Der Kolibrisalmler *Trochilocharax ornatos* gen. et spec. nov. ein neuer Salmmler aus Peru (Teleostei: Characiformes: Characidae). *Vertebrate Zoology* **60**: 75–98.

**Zarske A. 2011.** *Hemigrammus filamentosus* spec. nov. der südamerikanische Fadensalmler, ein neuer Salmmler (Teleostei: Characiformes: Characidae) aus dem Araguaya-Becken in Brasilien. *Vertebrate Zoology* **61**: 3–12.

### SUPPORTING INFORMATION

Additional Supporting Information may be found in the online version of this article at the publisher's web-site.

**Table S1.** List of lot number, voucher and GenBank accession number for each taxon used in this study (with exception of Crenuchinae). Collection abbreviations follow [Sabaj \(2020\)](#). Gray highlight indicates sequences generated in this study.

**Table S2.** Distance genetic between species of Crenuchinae based on the mitochondrial marker cytochrome *c* oxidase subunit I.
